# Pancreas and beta-cell development: from the actual to the possible

L. Charles Murtaugh

The development of insulin-producing pancreatic beta ( $\beta$ )-cells represents the culmination of a complex developmental program. Cells of the posterior foregut assume a pancreatic identity, cells within the expanding pancreatic primordia adopt an endocrine fate, and a subset of these precursors becomes competent to generate  $\beta$ -cells. Postnatally,  $\beta$ -cells are primarily maintained by self-duplication rather than new differentiation. Although major gaps in our knowledge still persist, experiments across several organisms have shed increasing light on the steps of  $\beta$ -cell specification and differentiation. Increasing our understanding of the extrinsic, as well as intrinsic, mechanisms that control these processes should facilitate efforts to regenerate this important cell type in humans.

## Introduction

The pancreas serves two major functions: (i) the production of digestive enzymes, which are secreted by exocrine acinar cells and routed to the intestine by a branched ductal network; and (ii) the regulation of blood sugar, which is achieved by endocrine cells of the islets of Langerhans. Type 1 diabetes results from the autoimmune destruction of one islet cell type – the insulin-producing  $\beta$ -cells. Although insulin treatment has saved countless diabetics from early death, it represents an ameliorative treatment rather than a cure. A true cure for diabetes – and a triumph for the concept of ‘regenerative medicine’ – might be achieved by replacing lost  $\beta$ -cells. This was demonstrated in an animal model several decades ago: rats rendered diabetic by the  $\beta$ -cell toxin streptozotocin could be cured by injection of isogenic islets (Ballinger and Lacy, 1972).

Clinical diabetes researchers have since made considerable progress in translating this approach to human patients, although numerous hurdles remain (Naftanel and Harlan, 2004). Not least of these is the scarcity of transplantable islets, which explains the interest in generating  $\beta$ -cells artificially and the corollary interest in understanding how  $\beta$ -cells normally develop. Here, I review pancreas development from the perspective of the  $\beta$ -cell; several additional reviews should be consulted for a more comprehensive view (Edlund, 2002; Jensen, 2004; Slack, 1995). In addition, as the mouse provides the pre-eminent model for pancreas development, I will focus on this species, although not exclusively. In utero development of the human pancreas has obviously received less attention, but studies suggest that it resembles that of the mouse (Piper et al., 2004).

Because of its obvious medical importance, the pancreas has been subject to decades of close study. The differentiation of exocrine, and to a lesser extent endocrine, cells can be observed in simple histological sections, which allowed these processes to be studied and manipulated before the availability of immunohistochemical

methods. As discussed below, the pancreas was among the first organs in which the importance of epithelial-mesenchymal interactions was recognized (Golosow and Grobstein, 1962), and the development of enzymatic and radio-immunoassays for pancreatic gene products conferred remarkable quantitiveness to studies of the differentiation in this organ (Pictet and Rutter, 1972). The pancreas is also among the relatively few organ systems in which systematic promoter-mapping has informed embryology: two of the transcription factors most crucial for pancreas development, *Pdx1* (pancreatic and duodenal homeobox 1; also known as *Ipf1*) and *Ptf1a* (pancreas specific transcription factor 1a; also known as *PTF1-p48*), were identified as DNA-binding proteins on pancreatic promoters (Krapp et al., 1996; Ohlsson et al., 1993). As we shall see, few of the unsolved problems in pancreas and  $\beta$ -cell development are conceptually unique, and further work on this fascinating (and frustrating) organ should shed a more general light on the processes of specification, differentiation and regeneration.

## The anatomy of pancreas development

The pancreas is often described as two organs in one, due to the distinct function and organization of its endocrine and exocrine components. In higher vertebrates, it might more properly be thought of as four organs, as it comprises anatomically distinct dorsal and ventral lobes. Referred to in humans as the tail and head, respectively, these two pancreatic lobes arise as thickenings along the dorsal and ventral surfaces of the posterior foregut, near the prospective hepatic endoderm (Fig. 1A). These thickenings are histologically recognizable by approximately 9 days of development (E9.0–E9.5) in the mouse (Wessells and Cohen, 1967). Retaining luminal continuity with the gut tube, these structures evaginate into the surrounding mesenchyme as dense epithelial buds, which subsequently expand, branch and differentiate to yield a fully functional organ system prior to birth (Fig. 1A, Fig. 2). Gut rotation brings the two lobes into close apposition; in humans, their ductal systems undergo partial fusion, although this process is less obvious in rodents.

The bulk of the mature pancreas is comprised of acinar cells, connected to the intestine via a highly branched ductal tree, while islets are primarily scattered through the central regions of the organ. Several separate endocrine cell types comprise the islet:  $\beta$ -cells are the most prominent (50–80% of the total, depending on species) (Brissova et al., 2005; Cabrera et al., 2006), and tend to segregate to the islet core, with other cell types arranged closer to the mantle (see Fig. 3R). Glucagon-producing  $\alpha$ -cells are the next most-common cell type; the remaining islet cells, each comprising a small minority of the total, include  $\delta$ -cells, which produce somatostatin, PP cells, which produce pancreatic polypeptide, and the recently-described  $\epsilon$ -cells, which produce ghrelin (Prado et al., 2004; Wierup et al., 2002).

The visible anatomy of the developing pancreas is prefigured by the molecular anatomy of differential gene expression, and few genes are better studied in this regard than the homeodomain

University of Utah, Department of Human Genetics, 15 N. 2030 E. Room 2100, Salt Lake City, UT 84112, USA.

e-mail: murtaugh@genetics.utah.edu

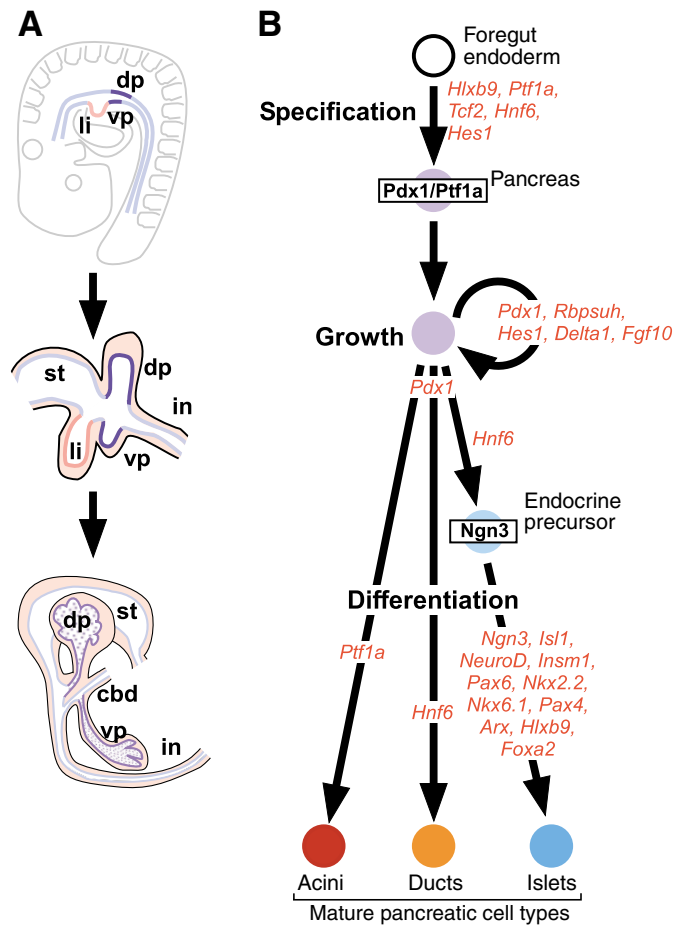

**Fig. 1. Pancreatic anatomy, lineages and genes.** (A) The dorsal and ventral pancreata (dp and vp, respectively) arise at approximately E8.5 in the mouse (top), from two strips of gut endoderm (marked dp, vp) that are located adjacent to the forming liver (li) within the developing gut endoderm. At E10.5 (middle), the pancreatic primordia bud out into the surrounding mesenchyme and occupy a position between the stomach (st) and intestine (in). Subsequent gut rotation, from E12.5 onward (bottom), brings the two lobes into closer apposition, although each maintains its original ductal connection to the intestine and/or common bile duct (cbd). (B) Lineage tracing indicates that all mature pancreatic cell types derive from progenitors that express *Pdx1* and/or *Ptf1a* (purple), and that a subset of these progenitors go on to express *Ngn3* and differentiate into islet cells. Genes listed in red are required for various aspects of the indicated steps, as described in the text.

transcription factor *Pdx1*. The initial expression of *Pdx1* (E8.5–E9.0) marks the pre-pancreatic endoderm before it has visibly thickened (Ahlgren et al., 1996; Guz et al., 1995; Offield et al., 1996) (Fig. 2), and corresponds to the classically defined period of pancreatic specification (Wessells and Cohen, 1967). Early *Pdx1* expression is therefore a useful marker of pancreatic identity, although it expands over the next several days of development to encompass the posterior stomach, duodenum and bile duct. Another transcription factor, *Ptf1a*, is also expressed in the early pancreas, and its endodermal expression remains pancreas-specific throughout development (Kawaguchi et al., 2002).

Genetic-lineage tracing (Box 1) shows that *Pdx1*<sup>+</sup> cells represent progenitors of all the mature pancreatic cell types, including duct, islet and acinar cells (Gu et al., 2002) (Fig. 1B). *Pdx1* is expressed

**Box 1. Lineage tracing and pancreas development.** Genetic-lineage-tracing techniques have produced considerable insight into the development of the pancreas and other tissues. The most common lineage-tracing approach uses Cre recombinase, which can delete DNA segments that are flanked by *loxP* (so-called floxed) sites (Brandt and Dymecki, 2004). Mouse strains have been developed in which the ubiquitous expression of a reporter gene, such as *LacZ*, is prevented by a floxed sequence being placed between the promoter and the reporter (Soriano, 1999); Cre-mediated deletion of this sequence results in heritable marking of the Cre-expressing cell. When Cre expression is driven by a promoter that is active in progenitor cells, the descent of those cells in various classes of differentiated offspring can be traced (Gu et al., 2002; Kawaguchi et al., 2002) (see Fig. 1). Conversely, if Cre is co-expressed with a differentiation marker, such as insulin, one can determine whether differentiated cells change their phenotype in the course of embryogenesis or adulthood. Such an approach was used to refute the hypothesis that mature  $\alpha$ - and  $\beta$ -cells are derived from progenitors that co-express glucagon and insulin (Herrera, 2000). Lineage tracing can therefore offer valuable insights that are not obvious from histological studies. A major limitation to the technique, however, is its relatively low resolution: if a particular Cre driver labels multiple differentiated cell types, it is impossible to distinguish whether that driver was active in multipotent progenitors or in separate classes of tissue-restricted precursor cells. A further limitation is that recombination converts an analog input (i.e. the level of Cre expression per cell), into a digital output (either the reporter gene is activated or not). A given Cre transgene can therefore fail to label a tissue of interest either because its promoter is completely silent in the progenitors of that tissue, or because the level of its expression falls below a crucial threshold for recombination. Cre transgenes often give incomplete labeling of specific tissues or cell types, possibly due to this sensitivity threshold.

broadly in the pancreas during the first several days of pancreas development, as the organ grows and branches (Figs 2, 3). *Ptf1a* expression is similarly broad at the early stages, and Kawaguchi et al. (Kawaguchi et al., 2002) have found, through lineage tracing with a *Ptf1a*<sup>Cre</sup> knock-in allele, that *Ptf1a*<sup>+</sup> cells contribute to all three mature lineages. These authors also observed that a minor population of duct and islet cells was not labeled by *Ptf1a*<sup>Cre</sup>, possibly due to the fact that *Ptf1a* expression becomes restricted to acinar precursor cells by approximately E13.5 (Fig. 2).

*Ptf1a* and *Pdx1* each play crucial roles in pancreas specification, as discussed below, yet were identified for their roles in adult cell type-specific gene expression. Consistent with its later phase of expression, *Ptf1a* was identified as an acinar gene activator (Krapp et al., 1996), and *Ptf1a*-deficient pancreata entirely lack acinar cells (Krapp et al., 1998). *Pdx1*, meanwhile, was identified as a regulator of the rat insulin 1 (*Ins1*) gene (Ohlsson et al., 1993), and from E15.5 onwards its expression becomes mainly restricted to  $\beta$ -cells. (Note that rodents have two insulin genes, whereas primates have only one; as the regulation and pancreatic expression of these genes are nearly identical, I refer to them collectively as *insulin*.) The transitions of *Pdx1* and *Ptf1a* expression coincide with the overall conversion of progenitors to mature endocrine and exocrine cells (Figs 2, 3). This conversion is also reflected in the dynamic expression of the bHLH transcription factor neurogenin 3 (*Neurog3*, also known as *Ngn3*), which specifically marks precursors of islet cells (Gu et al., 2002) (Fig. 1). *Ngn3*<sup>+</sup> cells appear in small numbers in the early organ, dramatically increase during mid-embryogenesis, and finally decline

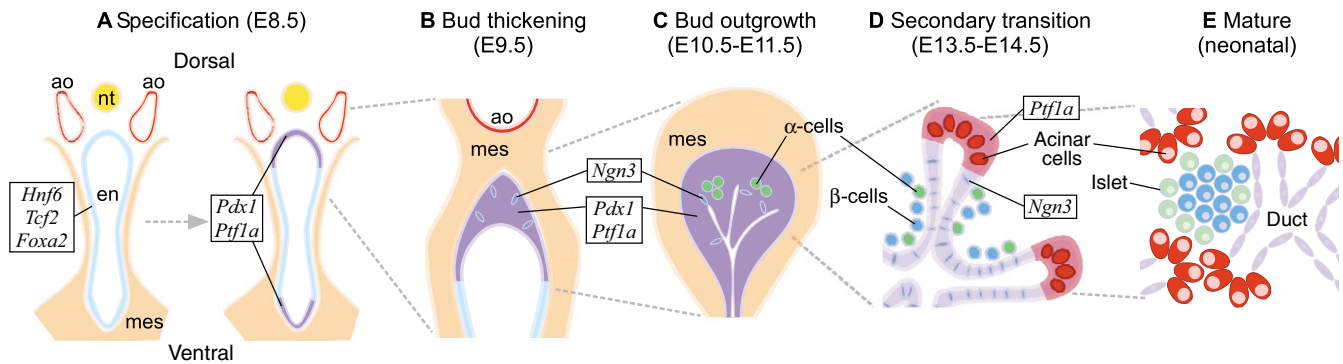

**Fig. 2. Stages of pancreas development.** Schematic cross-sections of developing embryos and organs, representing the progression of pancreas development. (A) Concomitant with specification of the organ, *Pdx1* and *Ptf1a* initiate expression in two restricted domains of the gut endoderm (en). Nearby tissues, including notochord (nt) and aorta (ao), may promote this specification process (Kim et al., 1997; Lammert et al., 2001; Yoshitomi and Zaret, 2004). (B) Mesenchyme (mes) surrounds the thickening buds as the first *Ngn3*<sup>+</sup> pro-endocrine cells appear. (C) Subsequent outgrowth produces a dense epithelial bud, in which early  $\alpha$ -cells begin to differentiate. (D) Further growth and branching precedes the secondary transition, which is marked by a massive differentiation of  $\beta$ -cell and acinar cells, as well as by the progressive restriction of *Pdx1* and *Ptf1a* expression to these respective cell types. (E) The organ has assumed its mature form by birth, with distinct islets of Langerhans scattered among exocrine acini and ducts.

towards birth (Figs 2, 3) (Gradwohl et al., 2000; Schwitzgebel et al., 2000). Similar to neurons, therefore, islet cells are ordinarily generated during a restricted developmental window; this process is termed neogenesis, in order to distinguish it from the proliferation of pre-existing islet cells.

*Ngn3* is expressed in duct-like epithelial cells that are centrally located within the developing pancreas; as these cells differentiate, they downregulate *Ngn3*, exit the epithelium and aggregate into

proto-islet structures (Pictet and Rutter, 1972; Schwitzgebel et al., 2000). Importantly, the spectrum of endocrine differentiation changes through embryogenesis, with  $\alpha$ -cells being born quite early (see Box 2) and other cell types, including  $\beta$ -cells, not being generated in significant numbers until E13.5 or later (Herrera et al., 1991; Pictet and Rutter, 1972) (Figs 2, 3). Interestingly,  $\beta$ -cell differentiation occurs simultaneously with that of acinar cells, albeit in a different region of the organ (Fig. 2), during a period termed the

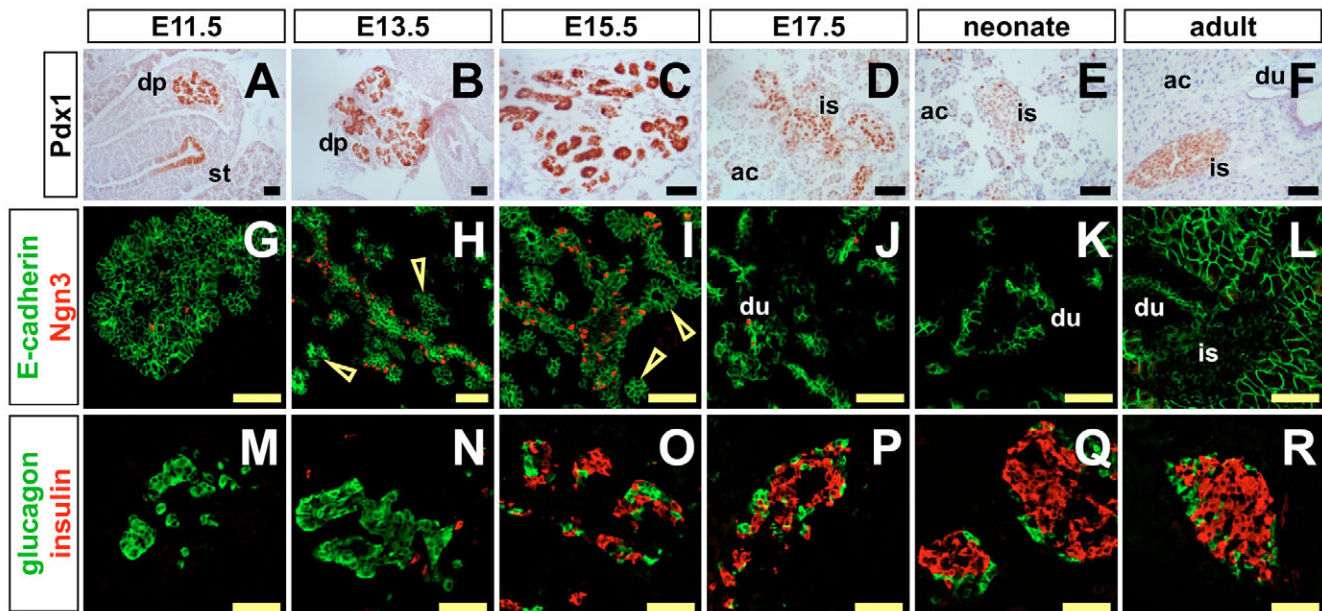

**Fig. 3. Dynamics of endocrine specification and differentiation.** (A-F) Brightfield photomicrographs of *Pdx1* immunostaining at various stages of mouse dorsal pancreas (dp) development. From E11.5-E15.5, *Pdx1* is expressed throughout the pancreatic epithelium (as well as in the posterior stomach, st), and is subsequently downregulated in acini (ac) and ducts (du) while being maintained in islet  $\beta$ -cells (is). (G-L) Confocal immunofluorescence photomicrographs at equivalent stages, for the pan-epithelial marker E-cadherin (green) and the islet precursor marker *Ngn3* (red). *Ngn3* expression is rare at E11.5, dramatically peaks during the secondary transition (E13.5-E15.5) and declines again at E17.5, becoming undetectable in neonatal and adult pancreas. Arrowheads indicate proto-acinar clusters at the periphery of the branched epithelium, from which *Ngn3* expression is consistently excluded. (M-R) Confocal detection of glucagon (green) and insulin (red). Glucagon<sup>+</sup>  $\alpha$ -cells are relatively common at E11.5 and E13.5, whereas large numbers of insulin<sup>+</sup>  $\beta$ -cells are not detected until after E13.5. From E17.5 onwards, endocrine cells aggregate into recognizable islets, with  $\beta$ -cells at their cores and  $\alpha$ -cells distributed peripherally. Scale bar in all images, 50  $\mu$ m.



'secondary transition' (Pictet and Rutter, 1972). Newly differentiated islet cells are non-dividing, although they resume low levels of proliferation towards birth (Sander et al., 2000).

The observation that islets arise from duct-like progenitors has led to the longstanding hope that the duct of the mature pancreas could be coaxed into renewed  $\beta$ -cell neogenesis. As we shall see, it remains unclear whether this occurs in the normal pancreas, or whether it can be induced in vitro. The same uncertainty applies to essentially all potential sources of transplantable  $\beta$ -cells. The only tissue that unambiguously exhibits  $\beta$ -cell neogenesis is the embryonic pancreas, and reproducing this feat elsewhere will probably require that we understand how it happens in situ.

## Specification of the early pancreas

### Local versus global signals

As early *Pdx1* expression marks the newly-specified pancreas, one approach to the problem of pancreas specification is to ask what lies upstream of *Pdx1*. Promoter-mapping has identified putative activators of *Pdx1*, including the winged-helix transcription factor forkhead box A2 (*Foxa2*) (Wu et al., 1997) and the one cut domain, family member 1 (*Onecut1*, also referred to as *Hnf6*) (Jacquemin et al., 2003). Deletion of *Foxa2* throughout the early mouse endoderm does not impair *Pdx1* activation, however, although subsequent  $\alpha$ -cell differentiation is severely impaired (Lee et al., 2005), whereas *Hnf6*-knockout mice still activate *Pdx1* expression, albeit with a slight delay (Jacquemin et al., 2003). Mouse embryos lacking the transcription factors SRY-box containing gene 17 (*Sox17*) (Kanai-Azuma et al., 2002) or the homeodomain factor *Tcf2* (transcription factor 2, also known as *Hnf1 $\beta$* ) (Haumaitre et al., 2005; Sun and Hopkins, 2001) also exhibit absent or severely reduced *Pdx1* expression, respectively, although it is unknown whether either factor directly regulates *Pdx1*. As none of these transcription factors are expressed in a domain as restricted as that of *Pdx1*, it is most likely that they act cooperatively, potentially in concert with additional intrinsic and extrinsic regulators that are, as yet, undiscovered.

The first extrinsic signals to be implicated in pancreas specification were transforming growth factor- $\beta$  (TGF $\beta$ ) proteins of the activin or nodal families, and retinoic acid (RA). Experiments in the frog *Xenopus laevis* (Gamer and Wright, 1995; Henry et al., 1996), later confirmed in the mouse (Tremblay et al., 2000), show

that TGF $\beta$  signaling is required for endoderm formation. Experiments in frog embryos have also shown that transient exposure to activin and RA can induce pancreas development from isolated animal cap ectoderm (Moriya et al., 2000). Recent studies suggest that TGF $\beta$  signaling induces definitive endoderm in mouse and human embryonic stem (ES) cells (D'Amour et al., 2005; Kubo et al., 2004; Yasunaga et al., 2005), and that RA treatment promotes *Pdx1* expression and pancreas specification in ES cell-derived endoderm (D'Amour et al., 2006; Micallef et al., 2005). These results strongly support the idea that studying early pancreas development can inform efforts to generate new  $\beta$ -cells.

RA is widely considered to be a mediator of global anteroposterior (AP) patterning, and RA-deficient zebrafish exhibit endoderm anteriorization, which eliminates the liver as well as the pancreas (Stafford and Prince, 2002). In *Xenopus* and mouse, however, RA is required only for dorsal pancreas development, and is dispensable for the development of both the ventral pancreas and liver (Chen et al., 2004; Martin et al., 2005; Molotkov et al., 2005). Although embryologists like to think globally, the best-characterized interactions in pancreas specification seem to act locally. A possible exception, recently described, is fibroblast growth factor 4 (Fgf4), which is expressed in the posterior mesoderm, following gastrulation, and promotes posteriorization of the endoderm (Wells and Melton, 2000). The pancreas appears to arise from cells that receive intermediate levels of Fgf4, and manipulations of Fgf4 levels in the early embryo can expand or contract the pre-pancreatic domain (Dessimoz et al., 2006).

### Distinctive dorsal and ventral specification programs?

Both lobes of the pancreas are sensitive to local signals, positive and negative. RA, synthesized by the product of the aldehyde dehydrogenase family 1, subfamily A2 (*Aldh1a2*, also referred to as *Raldh2*) gene, represents one of these positive signals, although its target may actually be outside the endoderm. Tissue-recombination studies have shown that expression of the homeodomain factor ISL1 transcription factor, LIM/homeodomain (*Isl1*) in the peripancreatic mesenchyme is essential for dorsal pancreas development (Ahlgren et al., 1997). This mesenchymal expression is lost in *Raldh2* mutants, possibly accounting for their lack of dorsal pancreas (Martin et al., 2005). The precise spatial relationships between endoderm and mesoderm are also crucial, as revealed by studies of mice lacking the homeodomain transcription factors bagpipe homeobox 1 (*Bapx1*) (Asayesh et al., 2006) and hematopoietically-expressed homeobox (*Hhex*) (Bort et al., 2004). These genes act outside the pancreas, but mediate morphogenetic movements that separate the dorsal (*Bapx1*) and ventral (*Hhex*) pancreata from inhibitory cues. Other genes that are differentially required for dorsal bud and ventral bud development, including N-cadherin and the receptor tyrosine kinase *Kdr* (previously known as *Flk1*), also act outside the endoderm (Esni et al., 2001; Yoshitomi and Zaret, 2004). *Hlxb9* (homeobox gene B9)-knockout mice lack a dorsal pancreas, and, because this gene is co-expressed with *Pdx1* in the early pancreas (albeit ventrally as well as dorsally), its knockout is often cited as evidence for intrinsic differences in the specification of the dorsal and ventral lobes (Harrison et al., 1999; Li et al., 1999). *Hlxb9* is also expressed in the notochord, however, which itself is required for dorsal pancreas development (Kim et al., 1997), and the knockout phenotype may actually be due to defects in this tissue, rather than in the pancreas itself.

The idea of distinctive dorsal and ventral programs is also supported by *Pdx1* and *Tcf2* knockouts – in which the dorsal bud forms and expands somewhat into the mesenchyme, whereas the ventral bud is undetectable (Haumaitre et al., 2005; Offield et al.,

**Box 2. Distinct regulation of early and late islet cell development.** Glucagon<sup>+</sup> cells appear as early as E9.5 in the developing mouse pancreas, and a subset of these cells appears to co-express insulin (Teitelman et al., 1993). As noted in Box 1, lineage tracing indicates that these double-positive cells are not precursors of mature  $\alpha$ - and  $\beta$ -cells (Herrera, 2000), and their functional significance remains unclear. These early islet cells do not express the complement of markers typical of their mature counterparts (Pang et al., 1994; Wilson et al., 2002), and they still form in several knockout mice in which later islet development is impaired (Ahlgren et al., 1996; Collombat et al., 2003; Offield et al., 1996; Sander et al., 2000). A distinct population of early islet cells, expressing insulin exclusively, also forms in zebrafish and *Xenopus* (Afelik et al., 2006; Field et al., 2003), whereas early islet cells are not found in the human embryonic pancreas (Piper et al., 2004). Together, these observations suggest that the secondary transition represents the major phase of islet development, and that regulatory programs governing early and late islet populations are only partially overlapping.

1996) – as well as by *Ptf1a* knockouts, in which at least a fragment of the dorsal bud forms and begins to expand while the prospective ventral bud ends up contributing to intestine (Kawaguchi et al., 2002). It should be emphasized, however, that much of the *Ptf1a*<sup>-/-</sup> dorsal bud assumes an intestinal fate as well, suggesting that the difference between the buds is of degree rather than kind. Indeed, the dorsal pancreatic bud starts out physically larger than the ventral, and may therefore have a ‘head start’ in the tissue movements that separate prospective pancreatic tissue from nearby inhibitory cues. In *Pdx1*, *Tcf2* and *Ptf1a* mutants, this slight edge may suffice for some of the dorsal pancreas to expand into the permissive mesenchyme, while the ventral pancreas cannot escape signals that divert it towards an intestinal or biliary fate. Future work will probably identify additional signals that act directly on the endoderm, and these findings might be used to achieve the directed differentiation of pancreas and  $\beta$ -cells.

### Master regulators of pancreas specification

Perhaps the need for signals that promote pancreas and  $\beta$ -cell development could be bypassed altogether, if we could transduce cells from another organ with a ‘master regulator’ of pancreas development. A number of investigators have taken this approach with the adult liver, using *Pdx1* as a candidate master regulator. Initial work indicated that adenoviral misexpression of *Pdx1* can induce a small number of insulin<sup>+</sup> cells in the liver (Ferber et al., 2000); subsequent studies have extended these findings, in some cases demonstrating limited activation of exocrine gene expression as well (Ber et al., 2003; Kojima et al., 2003; Miyatsuka et al., 2003; Sapir et al., 2005). The Pdx1 protein directly binds and activates the *insulin* promoter (Ohlsson et al., 1993), as well as that of at least one acinar enzyme gene (Swift et al., 1998), and it remains unclear whether the observed induction of pancreatic genes by *Pdx1* represents true transdifferentiation or an artificial ‘forcing’ of pancreas-specific gene expression.

From a therapeutic standpoint, this may be irrelevant, and reprogramming of liver cells by the expression of *Pdx1* and/or other  $\beta$ -cell regulatory factors (described below) remains an attractive possibility. From our perspective as developmental biologists, however, these studies cannot settle the question of whether *Pdx1* acts as a true specification factor for the pancreas. Indeed, efforts to induce ectopic pancreas via *Pdx1* misexpression in the embryo have proven unsuccessful (Afelik et al., 2006; Grapin-Botton et al., 2001; Heller et al., 1998; Horb et al., 2003). By contrast, expression of the hybrid protein Pdx1-VP16, in which Pdx1 is fused to the strong transcriptional activator VP16, can fully convert embryonic *Xenopus* liver to pancreas, including both exocrine and endocrine components (Horb et al., 2003). Similar results were obtained upon transducing human hepatoma cells with *Pdx1-VP16*, and this fusion construct is now being successfully applied by liver-to- $\beta$ -cell researchers (Imai et al., 2005; Kaneto et al., 2005; Li et al., 2005).

Endogenously, of course, Pdx1 does not have the benefit of a VP16 activation domain, but it may exert similar effects via collaboration with Ptf1a. This is suggested by recent studies of mice that lack hairy and enhancer of split 1 (*Hes1*), a transcriptional repressor that mediates Notch signaling in the pancreas and elsewhere (Fukuda et al., 2006; Sumazaki et al., 2004). In addition to their intra-pancreatic phenotype, as discussed below, *Hes1* mutants develop patches of ectopic pancreas tissue in posterior stomach, duodenum and bile duct. These tissues normally express *Pdx1*, and, in the absence of *Hes1*, they also express *Ptf1a*, precisely where pancreatic tissue later forms. Moreover, *Ptf1a* is required for ectopic pancreas development in *Hes1* mutants, suggesting that its

co-expression with *Pdx1* may be necessary and sufficient for pancreatic specification; this hypothesis is supported by a recent misexpression study in *Xenopus* (Afelik et al., 2006). The fact that *Hes1* normally represses *Ptf1a* suggests that manipulation of the Notch pathway could provide a tool for the directed development of pancreas in vitro, although it remains to be shown that the requirement for *Hes1* in the early gut reflects the action of Notch signaling per se.

### Establishing endocrine and exocrine compartments: everything in its right place

Are cells of the early pancreas multipotent, capable of contributing to both the endocrine and exocrine compartments, or do they arise already committed to one or the other lineage? The only direct evidence bearing on this question is a single report, based on retroviral ‘tagging’ in vitro, which showed that single cells in the E11.5 dorsal bud can give rise to both acinar and islet descendents (Fishman and Melton, 2002). This conclusion is supported by indirect evidence from embryological and genetic manipulations that alter the balance of endocrine and exocrine development. These include studies of epithelial-mesenchymal interactions, which for decades have been known to promote growth and acinar differentiation of the bud-stage pancreas (Golosow and Grobstein, 1962). Cultured without mesenchyme, pancreatic epithelium shows little proliferation and fails to produce acinar cells (Horb and Slack, 2000); more-recent studies have shown that endocrine differentiation is actually enhanced in the absence of mesenchyme, as though multipotent progenitors choose islet fates by default (Duvillie et al., 2006; Gittes et al., 1996; Miralles et al., 1998). Alternatively, the removal of mesenchyme may enhance the proliferation of an endocrine-restricted progenitor population; improved lineage-tracing techniques, permitting robust labeling of single cells and their progeny, will be required to distinguish between these possibilities.

A similar enhancement of endocrine development is observed in pancreata lacking one of several Notch signaling components [see Lai (Lai, 2004), for a recent review of the Notch pathway]. The overall role of Notch signaling in the pancreas appears to be to delay the differentiation of progenitor cells until the secondary transition, when an unknown mechanism renders them competent to assume  $\beta$ -cell, acinar and other later-born fates. Knockouts of the Delta-family ligand delta-like-1 (*Dll1*), the Notch DNA-binding partner recombining binding protein suppressor of hairless (*Rbpsuh*, also referred to as *RBPJK* and *CBF1*) or the target gene *Hes1* all exhibit pancreatic hypoplasia due to premature differentiation of progenitor cells into endocrine  $\alpha$ -cells (Apelqvist et al., 1999; Jensen et al., 2000). Sustained Notch signaling, by contrast, inhibits acinar, as well as islet, differentiation (Esni et al., 2004; Hald et al., 2003; Murtaugh et al., 2003). The mesenchyme appears to enhance Notch activity within the epithelium through the secretion of growth factors such as Fgf10 (Bhushan et al., 2001; Duvillie et al., 2006; Hart et al., 2003; Miralles et al., 2006; Norgaard et al., 2003). By extending the temporal window of epithelial Notch signaling, the mesenchyme thus indirectly promotes acinar and  $\beta$ -cell development, although it may also produce additional signals that more directly influence the exocrine-endocrine decision (Li et al., 2004).

Whereas Notch signals negatively regulate endocrine development, certain members of the TGF $\beta$  superfamily appear to promote endocrine specification, possibly at the expense of exocrine. Thus, early pancreatic-bud explants treated with the ligand TGF $\beta$ 1 in vitro develop increased numbers of islet cells, and fewer acini (Sanvito et al., 1994). TGF $\beta$ 1 activates the MAD homolog 2

(Smad2) and Smad3 signal transduction pathway (reviewed by Massague et al., 2005), which is also activated by activin family ligands, and treatment of early buds with the activin antagonist follistatin enhances acinar development, while inhibiting that of islets (Miralles et al., 1998). This result suggests that endogenous activin-family ligands normally promote endocrine development; consistent with this hypothesis, the developing pancreata of mice that lack the type IIB activin receptor have severely reduced islet mass, but apparently normal acinar tissue (Kim et al., 2000). Paradoxically, however, mouse embryos heterozygous for the *Smad2* gene, which should be impaired for activin and TGF $\beta$  signaling, exhibit increased numbers of *Ngn3*<sup>+</sup> islet precursor cells (Harmon et al., 2004). Precisely how and when activin/TGF $\beta$ -family members act in the developing pancreas therefore remain important open questions.

The central intrinsic regulator of endocrine specification is *Ngn3*, the expression of which is necessary and sufficient for endocrine development in the pancreatic endoderm (Apelqvist et al., 1999; Gradwohl et al., 2000; Grapin-Botton et al., 2001; Schwitzgebel et al., 2000) (although see Box 3). The scattered distribution of *Ngn3*<sup>+</sup> cells within the epithelium (see Fig. 3G-L) reflects, in part, repression by Notch activity, because *Ngn3*<sup>+</sup> cell numbers increase in the absence of *Dll1* or *Rbpsuh*, prefiguring precocious endocrine differentiation (Apelqvist et al., 1999; Fujikura et al., 2006). Furthermore, *Ngn3* is a target for direct repression by Hes1 (Lee et al., 2001). In addition to *Dll1*, the developing pancreatic epithelium expresses Notch ligands of the Serrate/Jagged family, and two recent studies confirm that this ligand family is involved in endocrine development. First, morpholino knockdown studies in zebrafish embryos show that loss of specific Jagged-family ligands causes ectopic islet cell differentiation (Zecchin et al., 2006). Notch activation by Serrate/Jagged ligands is inhibited by glycosyltransferases of the Fringe family (Haltiwanger and Stanley,

2002), and a second recent study demonstrates that the expression of one family member, manic fringe homolog (*Mfng*), partially overlaps with that of *Ngn3* in the developing pancreas (Xu et al., 2006). Moreover, misexpression of *Mfng* was found to induce endocrine cells (primarily  $\alpha$ -cells), apparently via the inhibition of Notch and the upregulation of *Ngn3*. Together, these studies emphasize the crucial role of the Notch-*Ngn3* regulatory axis in islet development, and highlight the need to better understand Notch ligand distribution and function in the developing pancreas.

Transcription of *Ngn3* presumably reflects the input of positive, as well as negative, regulators, the best-characterized of which is *Hnf6* (Jacquemin et al., 2000). *Hnf6* directly binds and activates the *Ngn3* promoter in vitro and is genetically required for its expression. *Hnf6* is expressed throughout the developing pancreas, however, as well as in domains of the foregut that lack *Ngn3* expression (Landry et al., 1997; Rausa et al., 1997), and *Hnf6*<sup>-/-</sup> mutants exhibit numerous additional defects in pancreatic organogenesis, to which their loss of *Ngn3* may be secondary (Jacquemin et al., 2003; Pierreux et al., 2006).

Neither Notch activity nor *Hnf6* expression can obviously account for another aspect of *Ngn3* expression, rarely discussed but easy to see: its segregation into a central, 'pro-endocrine' domain, and exclusion from a peripheral 'pro-exocrine' region (Fig. 3). Although there are many candidates, no signals have yet been identified that can account for such a restricted expression pattern, or indeed for the overall morphological organization of the developing pancreas.

*Ngn3*<sup>+</sup> cells rapidly activate a battery of transcription factors that constitute a 'core program' of endocrine development, in that they appear to be expressed in all endocrine precursors, and are required, quantitatively or qualitatively, for the development of many or all islet cell types (Fig. 4A, Table 1). These include *Isl1*, neurogenic differentiation 1 (*NeuroD1*) and insulinoma-associated 1 (*Insm1/IA1*) (Ahlgren et al., 1997; Gierl et al., 2006; Naya et al., 1997). *Ngn3* is

**Box 3. Islet development without *Ngn3*?** A recent human genetics study raises the startling possibility that human  $\beta$ -cells can develop without *Ngn3* function (Wang et al., 2006). Three unrelated children were identified with congenital malabsorptive diarrhea, and biopsies revealed an almost complete absence of endocrine cells in their intestines, a phenotype similar to that of *Ngn3*-null mice (Jenny et al., 2002). Sequencing revealed that these patients carry homozygous mis-sense mutations in the bHLH region of the human *NGN3* gene, which render *NGN3* completely non-functional in overexpression experiments. Importantly, the affected children were not hyperglycemic at birth, although two of them later (aged 8 years) developed type 1 diabetes of unknown etiology. (The third child developed severe liver disease and died at age 3.) The pancreata of these children were not examined in infancy to confirm the presence of  $\beta$ -cells, and genetic experiments (e.g. targeted replacement of wild-type mouse *Ngn3* with one of these *NGN3* mutants) will be required to confirm that these mutations represent nulls. Nonetheless, the most straightforward interpretation is that another pathway can compensate for the lack of *NGN3* in human pancreas development (Wang et al., 2006). *Ngn3*-null mice are completely devoid of islet cells at birth, and die shortly thereafter (Gradwohl et al., 2000). If this early death, possibly caused by malabsorptive diarrhea, as in humans, could be prevented, it is formally possible that a novel pathway of *Ngn3*-independent islet development could be uncovered postnatally (Wang et al., 2006). Such experiments would be especially important if the *NGN3* mutants identified in this study prove to be true nulls.

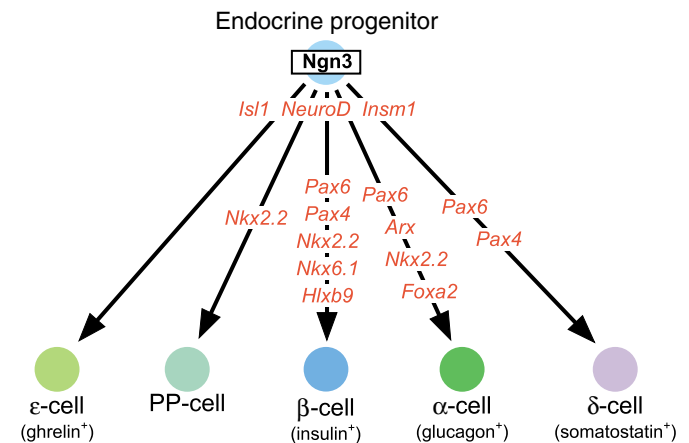

**Fig. 4. Pathways of islet-subtype specification.** A hypothetical lineage diagram for *Ngn3*<sup>+</sup> endocrine precursors, which give rise to all islet cell types (here, a single *Ngn3*<sup>+</sup> cell is depicted giving rise to each subtype, whereas, in reality, the potential of a given *Ngn3*<sup>+</sup> cell may be more restricted). In red are genes required for various steps of this process; some of which (top) appear to function similarly in all subtypes, constituting a core program of endocrine development, whereas others (bottom) are differentially required for specific subtypes (also see Table 1). Although more genes have been implicated in  $\beta$ -cell development than in that of other subtypes, this is probably due to the greater effort focused on this cell type, rather than an inherently greater complexity in its developmental program.



**Table 1. Genes required for endocrine development**

| Gene                               | Islet cell types affected in knockout                                                     | References                                       |
|------------------------------------|-------------------------------------------------------------------------------------------|--------------------------------------------------|
| <b>Core endocrine program</b>      |                                                                                           |                                                  |
| <i>Isl1</i>                        | All (absent)                                                                              | Ahlgren et al., 1997                             |
| <i>NeuroD</i>                      | All (reduced)                                                                             | Naya et al., 1997                                |
| <i>Insm1/IA1</i>                   | $\alpha$ -, $\beta$ - and $\delta$ -cells (reduced)                                       | Gierl et al., 2006                               |
| <b>Islet subtype specification</b> |                                                                                           |                                                  |
| <i>Pax6</i>                        | $\alpha$ -, $\beta$ - and $\delta$ -cells (reduced); $\epsilon$ -cells (increased)        | Heller et al., 2005; Sander et al., 1997         |
| <i>Pax4</i>                        | $\beta$ -cells (strongly reduced); $\delta$ -cells (absent); $\alpha$ -cells (increased)  | Collombat et al., 2005; Sosa-Pineda et al., 1997 |
| <i>Arx</i>                         | $\alpha$ -cells (absent); $\beta$ - and $\delta$ -cells (increased)                       | Collombat et al., 2003                           |
| <i>Nkx2.2</i>                      | $\beta$ -cells (absent); $\alpha$ - and PP-cells (reduced); $\epsilon$ -cells (increased) | Sussel et al., 1998; Wang et al., 2004           |
| <i>Nkx6.1</i>                      | $\beta$ -cells (absent)                                                                   | Sander et al., 2000                              |
| <i>Hlxb9</i>                       | $\beta$ -cells (reduced)                                                                  | Harrison et al., 1999; Li et al., 1999           |
| <i>Foxa2</i>                       | $\alpha$ -cells (strongly reduced)                                                        | Lee et al., 2005                                 |

Genetic analyses implicate these genes in various aspects of islet development, either acting in a general program that generates most or all endocrine cells, or to promote the development of specific endocrine cell subtypes. As indicated, the latter class includes genes whose deletion phenotype causes decreases in one or more cell types balanced by increases in others, indicating that they act to bias the cell fate decision of a multipotent progenitor. Not listed are genes whose deletion compromises islet cell function, without preventing specification or differentiation.

required for the expression of all known islet-specific transcription factors (Collombat et al., 2003; Gradwohl et al., 2000; Mellitzer et al., 2006), and presumably their collective absence accounts for the lack of islet cells in *Ngn3*<sup>-/-</sup> pancreata. Precisely how these factors individually promote endocrine development is not well understood. For instance, *NeuroD1* is thought to activate the *insulin* promoter, yet *NeuroD1*<sup>-/-</sup> pancreata still generate insulin-expressing  $\beta$ -cells, which are later eliminated by apoptosis (Naya et al., 1997; Naya et al., 1995).

We began this section by considering whether early *Pdx1*<sup>+</sup> progenitors are truly multipotent, and a similar question applies to *Ngn3*<sup>+</sup> cells. Although conventional lineage diagrams depict single *Ngn3*<sup>+</sup> cells giving rise to multiple islet cell types (Fig. 4), it is equally plausible that five (or more) independent classes of *Ngn3*<sup>+</sup> cells exist, one for each mature cell type in the islet. Distinguishing these models, however, will require lineage-tracing techniques of considerable higher resolution than are currently available.

### **$\beta$ -cell precursors: what do they know and when?**

Table 1 lists genes that exhibit expression patterns and knockout phenotypes consistent with their having a role in islet subtype specification. These are distinguished from the core program genes discussed above, perhaps arbitrarily, in that their deletion causes a very discrete loss of cell types [e.g. NK6 related, locus 1 (*Nkx6.1*, also known as *Nkx6-1*)], or results in reciprocal increases in one or another cell type, at the expense of others [e.g. paired box gene 6 (*Pax6*)]. As the roles of these genes in endocrine development have recently been reviewed (Collombat et al., 2006; Servitja and Ferrer, 2004), I will focus on only one aspect of endocrine subtype specification: when does it happen?

Some insight is offered by the expression, regulation and function of the transcription factor paired box gene 4 (*Pax4*) in  $\beta$ -cell development. First, *Pax4* is expressed exclusively during embryogenesis, and tracing the initiation and perdurance of its expression (by staining for  $\beta$ -galactosidase protein in *Pax4*<sup>LacZ/+</sup> mice) indicates that it is expressed strongly in  $\beta$ -cell precursors but only transiently, if at all, in the  $\alpha$ -cell lineage (Wang et al., 2004). Second, *Pax4* is not expressed in the absence of *Ngn3* (Gradwohl et al., 2000), and *Ngn3* appears to be a direct upstream activator of the *Pax4* promoter (Smith et al., 2003). Immediately upon activation, *Pax4* appears to be co-expressed with another transcription factor, aristaless related homeobox (*Arx*), also an *Ngn3* target gene, but

thereafter *Pax4* and *Arx* each begin to repress the expression of the other. Precursor cells subsequently partition into separate populations that express either *Pax4* or *Arx*, and these populations develop into  $\beta$ - or  $\delta$ -cells or  $\alpha$ -cells, respectively (Collombat et al., 2003). Finally, *Pax4* mutants develop an excess of  $\alpha$ -cells at the expense of  $\beta$ - and  $\delta$ -cells (Sosa-Pineda et al., 1997). Together, these results support the conventional model of  $\beta$ -cell specification, depicted in Fig. 4, in which *Ngn3*<sup>+</sup> cells adopt a  $\beta$ -cell fate, as opposed to an  $\alpha$ -cell fate, partly due to maintained *Pax4* expression [the role of *Pax4* in the somatostatin lineage is apparently more complex; Collombat et al. (Collombat et al., 2005)].

The major unknown in this scheme is how the antagonism between *Pax4* and *Arx* is resolved in such a way as to generate a reproducible balance between  $\alpha$ - and  $\beta$ -cell numbers. One possibility is that, once *Ngn3* activates expression of *Pax4* and *Arx*, extrinsic signals regulate the repressive activity of these transcription factors, tipping the balance of their mutual repression and favoring one lineage over another. Identifying such signals would certainly enhance the prospects for controlled  $\beta$ -cell development in vitro. Another possibility is that the expression levels of these two factors are subtly biased from the outset, such that  $\beta$ -cells develop from precursors that initiate higher levels of *Pax4*, and vice-versa for  $\alpha$ -cells and *Arx* expression. According to this hypothesis, *Pax4*-*Arx* cross-repression would essentially refine a pre-existing pattern established before *Ngn3* expression. There are no strong candidate molecules that would support either hypothesis (e.g. transcription factors that would cooperate with *Ngn3* in activating higher levels of *Pax4* in  $\beta$ -cell precursors), but further investigation of *Pax4* and *Arx* should continue to illuminate islet subtype specification.

The question of when  $\beta$ -cell specification begins is relevant to other factors involved in the process. Several transcription factors thought to act relatively late in  $\beta$ -cell specification, including *Nkx2.2*, *Nkx6.1* and *Hlxb9*, are expressed in not only  $\beta$ -cell precursors but also widely throughout the early progenitor population (Harrison et al., 1999; Li et al., 1999; Sander et al., 2000; Sussel et al., 1998). This early expression may be an epiphenomenon, or it may represent the first stage of a progressive process by which *Ngn3*<sup>+</sup> cells acquire  $\beta$ -cell differentiation competence. In liver development, by analogy, transcriptional activators of hepatocyte genes actually begin to modify the chromatin of their targets within multipotent progenitor cells, well

before those cells have committed to a hepatocyte fate (Zaret, 2002). In the case of *Nkx2.2*, separate regulatory elements appear to drive its expression in early progenitor cells, in *Ngn3*<sup>+</sup> precursors and in differentiated  $\beta$ -cells (Watada et al., 2003). If *Nkx2.2* is required prior to *Ngn3* expression, then deleting the progenitor-specific element – which has not yet been precisely mapped – should reproduce the  $\beta$ -cell deficiency observed in *Nkx2.2*<sup>-/-</sup> mice. If similar elements can be defined for *Nkx6.1* and *Hlxb9*, the same prediction holds for these factors as well.

The pancreas is not unique in generating different cell types over time from a common progenitor population: a similar phenomenon occurs in retinal development, where an intrinsic ‘clock’ appears to control the changing developmental competence of progenitor cells (Livesey and Cepko, 2001). Studies of retinal development have benefited from the use of very fine-scale lineage-tracing techniques (Turner and Cepko, 1987), and analogous approaches might be used to discern whether a similar timing mechanism exists in the pancreas, as well as to illuminate other mysteries of endocrine specification and differentiation.

### Adult $\beta$ -cells: keep on keeping on

A flurry of papers in the past several years has shown that the maintenance of  $\beta$ -cell function and numbers in postnatal life relies on mechanisms that appear to be distinct from those used to generate these cells in utero. With respect to function,  $\beta$ -cell differentiation is accompanied by activation of a novel transcriptional network that is involved in the maintenance of  $\beta$ -cell-specific gene expression (Boj et al., 2001). Haplo-insufficient mutations in components of this network cause the human syndrome maturity-onset diabetes of the young (MODY), which is characterized by the progressive impairment of insulin secretion (reviewed by Servitja and Ferrer, 2004). Among the most crucial members of the MODY gene network is *Pdx1* (Stoffers et al., 1997), which appears to activate a number of  $\beta$ -cell-specific genes, in addition to *insulin* (Carty et al., 1997; Chakrabarti et al., 2002; Waeber et al., 1996; Watada et al., 1996). Consistent with these observations,  $\beta$ -cell function is also rapidly lost upon  $\beta$ -cell-specific inactivation of *Pdx1* in mice (Ahlgren et al., 1998; Holland et al., 2005), highlighting the crucial role that this developmental factor plays in adulthood. (Indeed, while the targets of *Pdx1* in mature  $\beta$ -cells are relatively well-characterized, those mediating its functions in the developing organ are unknown.)

Additional regulators of  $\beta$ -cell function include *Neurod1*, of which heterozygous mutations also produce MODY in humans (Malecki et al., 1999), as well as the basic leucine-zipper (bZIP) transcription factor *Mafa* (v-maf musculoaponeurotic fibrosarcoma oncogene family, protein A) (Zhang et al., 2005). It should be emphasized that, although both of these genes were originally implicated in pancreas function through their binding to essential regulatory elements of the *insulin* promoter (Kataoka et al., 2002; Matsuoka et al., 2003; Naya et al., 1995; Olbrot et al., 2002), neither gene is absolutely required for *insulin* expression in vivo (in contrast to *Pdx1*). Issues of redundancy remain to be resolved regarding the function of these proteins at the *insulin* promoter; *Mafa*, for example, is co-expressed with the related *cMaf* (v-maf oncogene homolog) gene, which also activates the *insulin* promoter in vitro (Nishimura et al., 2006). Finally, global and tissue-specific knockouts in mice reveals that the *Foxa1* and *Foxa2* transcription factors are required for glucose-stimulated insulin secretion by  $\beta$ -cells, although not for *insulin* mRNA expression (Lantz et al., 2004; Vatamaniuk et al., 2006). Importantly, prenatal  $\beta$ -cell development occurs normally in the absence of *Mafa*, *Foxa1* or *Foxa2*,

emphasizing the distinction between genes that regulate specification and differentiation and those that regulate mature cellular function. It will be of considerable interest to determine whether *Maf*-family or *Foxa*-family mutations underlie any diabetes-related conditions in humans.

With respect to  $\beta$ -cell numbers, mice that lack the cyclin-dependent kinase *Cdk4* have a normal complement of  $\beta$ -cells at birth, but the failure of these cells to subsequently proliferate produces progressive hyperglycemia (Rane et al., 1999). A similar phenomenon occurs in mice deficient for cyclin D1 and/or cyclin D2 (Georgia and Bhushan, 2004; Kushner et al., 2005), and in mice with a pancreas-specific deletion of the *Foxm1* (forkhead box M1) transcription factor (Zhang et al., 1999). Essentially opposite results are obtained in mice heterozygous for the tumor-suppressor gene *Men1* (multiple endocrine neoplasia 1), or in those carrying a gain-of-function *cdk4* allele: normal pancreas development occurs until birth, followed by progressive  $\beta$ -cell hyperplasia (Crabtree et al., 2001; Rane et al., 1999). These results imply that, whereas  $\beta$ -cell production in utero depends on progenitor cell differentiation, their postnatal maintenance and expansion occurs primarily through proliferation. This has been confirmed by a genetic-lineage-tracing study, in which differentiated  $\beta$ -cells were labeled in adult mice and followed over several months. Despite an increase in total  $\beta$ -cell numbers during this time, the proportion of labeling did not decrease, indicating that the new cells arose from pre-existing  $\beta$ -cells (Dor et al., 2004).

The signals controlling  $\beta$ -cell proliferation are becoming increasingly well-understood. Mice lacking the insulin receptor in  $\beta$ -cells exhibit a severe reduction in adult  $\beta$ -cell mass (Otani et al., 2004), whereas  $\beta$ -cells deleted for *Pten*, a negative regulator of insulin-receptor signaling, undergo hyperplasia (Stiles et al., 2006). If this and other pathways could be manipulated in vitro, clinicians might be able to grow unlimited numbers of  $\beta$ -cells from scarce donor islets, providing transplantable material without even having to worry about developmental biology. Indeed, recent studies of diabetic mice suggest that blocking autoimmunity at early stages of the human disease could restore normoglycemia through the expansion of residual  $\beta$ -cells (Chong et al., 2006; Nishio et al., 2006; Suri et al., 2006).

Does  $\beta$ -cell neogenesis ever occur in the adult (e.g. through a pancreatic stem cell)? In uninjured mice, as summarized above, the weight of evidence is negative. Islet cell mass can regenerate following partial pancreatectomy, however, and strong correlative evidence from rodent studies suggests that at least part of this regenerative response reflects neogenesis from pre-existing duct cells or acini (reviewed by Bonner-Weir and Weir, 2005; Lardon and Bouwens, 2005). It should be noticed that the lineage-tracing study described above failed to find evidence for  $\beta$ -cell neogenesis following partial pancreatectomy (Dor et al., 2004), and an independent study found that *Ngn3* expression, which marks islet precursors in utero, could not be detected in pancreata recovering from partial pancreatectomy (Lee et al., 2006). Nonetheless, neither of these studies focused on the precise regions of the pancreas damaged during surgery, in which neogenesis might be most pronounced (Sharma et al., 1999). Past and present studies may also have differed in the severity or type of injury models that were applied. It now seems imperative to replicate past correlative studies with genetic-lineage-tracing techniques to answer this controversial and fundamental question.

Even if  $\beta$ -cell neogenesis does not occur endogenously, it may be experimentally inducible ex vivo. For example, transducing cultured human duct cells with *Ngn3* activates many islet-specific



genes, including *insulin*, albeit at low levels (Gasa et al., 2004; Heremans et al., 2002). A recent report indicates that non-endocrine epithelial cells of the adult human pancreas (presumably ductal or acinar) can be induced to adopt a  $\beta$ -cell fate by signals from fetal pancreas (Hao et al., 2006). Similar findings in the rat (Dudek et al., 1991) suggest that an embryonic differentiation program can be reactivated in adult pancreatic ducts, consistent with the overlap in gene expression that is seen between mature ducts and embryonic progenitors (Pierreux et al., 2006; Piper et al., 2004). Moreover, a recent study that combined *in vitro* culture with genetic-lineage tracing suggests that adult acinar cells can be coaxed to a  $\beta$ -cell fate (Minami et al., 2005), a result consistent with independent work documenting the plasticity of differentiation in mature acini (Means et al., 2005). As ducts and acini are currently discarded during human islet isolation, the prospect of spinning this dross into gold is highly attractive.

## Conclusion

The past decade has seen remarkable progress in understanding the molecular program of islet specification and differentiation. Nevertheless, we still cannot answer a number of questions raised in the pre-molecular era. Why, for instance, do  $\alpha$ -cells begin to differentiate days earlier than  $\beta$ -cells? Why, in turn, does  $\beta$ -cell differentiation occur simultaneously with that of acinar cells, yet in a spatially distinct region of the developing organ? What is the anatomical relationship between the duct-like progenitors of the embryo and the mature ducts of the adult, and can the functional program of the former be re-established in the latter? The application of molecular genetics to the study of  $\beta$ -cell development has itself raised almost as many questions as it has answered. When, for example, do *Ngn3*<sup>+</sup> cells become terminally specified, and to how many different cells and cell types can a single *Ngn3*<sup>+</sup> cell contribute? Although novel technical approaches are clearly required, for example a method of easily tracing the progeny of single progenitor cells, the history of the field encourages optimism that those approaches will be found and exploited.

Another set of open questions in pancreas development concerns the role of extracellular signaling pathways in cell fate specification. To date, the only strong genetic evidence for such a role comes from studies of the Notch, and to a lesser extent TGF $\beta$ , pathways. Testing the *in vivo* role of other signals will require that we carefully consider the different stages of  $\beta$ -cell specification, across which a single molecule might have multiple roles. The field will also benefit from the development of better *in vitro* culture techniques. It is easy enough to buy a growth factor and add it to a cultured pancreatic bud, yet relatively few consistent results have been reported from such studies, probably owing to minor technical differences.

One of the strengths of pancreas development research is its diversity of approaches, and maintaining that diversity is essential for the field to progress towards the controlled generation of human  $\beta$ -cells. Although the mouse offers numerous experimental advantages, important contributions have been made by studies in the embryos of the chick, fish and frog (e.g. Afelik et al., 2006; Dessimoz et al., 2006; Zecchin et al., 2006), and work on human tissue remains essential as well. Each stage of  $\beta$ -cell development, as summarized in Figs 1, 2, offers a unique starting point for potential therapeutic  $\beta$ -cell neogenesis: re-specification of hepatocytes, for example, via *Pdx1-VP16* expression, or  $\beta$ -cell induction from pancreatic duct cells by *Ngn3*. It may also be possible to fully recapitulate the process of pancreas and  $\beta$ -cell development in ES cells, and the recent efforts of D'Amour et al. (D'Amour et al., 2006) along these lines suggest that such an approach will hinge on

a robust understanding of normal developmental mechanisms. I must emphasize that, even with an unlimited supply of perfect  $\beta$ -cells, we will have to clear numerous hurdles before curing diabetes, not least of which is the autoimmune reaction that causes the disease in the first place. Nonetheless, the future study of pancreas development will not only enrich our basic understanding of organogenesis, but should also advance translational efforts towards that ultimate end.

I thank Sheldon Rowan, Gabrielle Kardon, Kristen Kwan and my anonymous reviewers for helpful comments on the manuscript, and I am indebted to Daniel Kopinke for the staining depicted in Fig. 3. Work in my lab on pancreas development is supported by the Searle Scholars Foundation.

## References

- Afelik, S., Chen, Y. and Pieler, T. (2006). Combined ectopic expression of *Pdx1* and *Ptf1a/p48* results in the stable conversion of posterior endoderm into endocrine and exocrine pancreatic tissue. *Genes Dev.* **20**, 1441-1446.
- Ahlgren, U., Jonsson, J. and Edlund, H. (1996). The morphogenesis of the pancreatic mesenchyme is uncoupled from that of the pancreatic epithelium in *IPF1/PDX1*-deficient mice. *Development* **122**, 1409-1416.
- Ahlgren, U., Pfaff, S. L., Jessell, T. M., Edlund, T. and Edlund, H. (1997). Independent requirement for *ISL1* in formation of pancreatic mesenchyme and islet cells. *Nature* **385**, 257-260.
- Ahlgren, U., Jonsson, J., Jonsson, L., Simu, K. and Edlund, H. (1998).  $\beta$ -cell-specific inactivation of the mouse *Ip1/Pdx1* gene results in loss of the  $\beta$ -cell phenotype and maturity onset diabetes. *Genes Dev.* **12**, 1763-1768.
- Apelqvist, A., Li, H., Sommer, L., Beatus, P., Anderson, D. J., Honjo, T., Hrabe de Angelis, M., Lendahl, U. and Edlund, H. (1999). Notch signalling controls pancreatic cell differentiation. *Nature* **400**, 877-881.
- Asayesh, A., Sharpe, J., Watson, R. P., Hecksher-Sorensen, J., Hastie, N. D., Hill, R. E. and Ahlgren, U. (2006). Spleen versus pancreas: strict control of organ interrelationship revealed by analyses of *Bapx1*<sup>-/-</sup> mice. *Genes Dev.* **20**, 2208-2213.
- Ballinger, W. F. and Lacy, P. E. (1972). Transplantation of intact pancreatic islets in rats. *Surgery* **72**, 175-186.
- Ber, I., Shternhall, K., Perl, S., Ohanuna, Z., Goldberg, I., Barshack, I., Benvenisti-Zarum, L., Meivar-Levy, I. and Ferber, S. (2003). Functional, persistent, and extended liver to pancreas transdifferentiation. *J. Biol. Chem.* **278**, 31950-31957.
- Bhushan, A., Itoh, N., Kato, S., Thiery, J. P., Czernichow, P., Bellusci, S. and Scharfmann, R. (2001). *Fgf10* is essential for maintaining the proliferative capacity of epithelial progenitor cells during early pancreatic organogenesis. *Development* **128**, 5109-5117.
- Boj, S. F., Parrizas, M., Maestro, M. A. and Ferrer, J. (2001). A transcription factor regulatory circuit in differentiated pancreatic cells. *Proc. Natl. Acad. Sci. USA* **98**, 14481-14486.
- Bonner-Weir, S. and Weir, G. C. (2005). New sources of pancreatic beta-cells. *Nat. Biotechnol.* **23**, 857-861.
- Bort, R., Martinez-Barbera, J. P., Beddington, R. S. and Zaret, K. S. (2004). Hex homeobox gene-dependent tissue positioning is required for organogenesis of the ventral pancreas. *Development* **131**, 797-806.
- Branda, C. S. and Dymecki, S. M. (2004). Talking about a revolution: The impact of site-specific recombinases on genetic analyses in mice. *Dev. Cell* **6**, 7-28.
- Brissova, M., Fowler, M. J., Nicholson, W. E., Chu, A., Hirshberg, B., Harlan, D. M. and Powers, A. C. (2005). Assessment of human pancreatic islet architecture and composition by laser scanning confocal microscopy. *J. Histochem. Cytochem.* **53**, 1087-1097.
- Cabrera, O., Berman, D. M., Kenyon, N. S., Ricordi, C., Berggren, P. O. and Caicedo, A. (2006). The unique cytoarchitecture of human pancreatic islets has implications for islet cell function. *Proc. Natl. Acad. Sci. USA* **103**, 2334-2339.
- Carty, M. D., Lillquist, J. S., Peshavaria, M., Stein, R. and Soeller, W. C. (1997). Identification of cis- and trans-active factors regulating human islet amyloid polypeptide gene expression in pancreatic beta-cells. *J. Biol. Chem.* **272**, 11986-11993.
- Chakrabarti, S. K., James, J. C. and Mirmira, R. G. (2002). Quantitative assessment of gene targeting *in vitro* and *in vivo* by the pancreatic transcription factor, *Pdx1*. Importance of chromatin structure in directing promoter binding. *J. Biol. Chem.* **277**, 13286-13293.
- Chen, Y., Pan, F. C., Brandes, N., Afelik, S., Solter, M. and Pieler, T. (2004). Retinoic acid signaling is essential for pancreas development and promotes endocrine at the expense of exocrine cell differentiation in *Xenopus*. *Dev. Biol.* **271**, 144-160.
- Chong, A. S., Shen, J., Tao, J., Yin, D., Kuznetsov, A., Hara, M. and Philipson, L. H. (2006). Reversal of diabetes in non-obese diabetic mice without spleen cell-derived beta cell regeneration. *Science* **311**, 1774-1775.
- Collombat, P., Mansouri, A., Hecksher-Sorensen, J., Serup, P., Krull, J.,

- Gradwohl, G. and Gruss, P. (2003). Opposing actions of Arx and Pax4 in endocrine pancreas development. *Genes Dev.* **17**, 2591-2603.
- Collombat, P., Hecksher-Sorensen, J., Broccoli, V., Krull, J., Ponte, I., Mundiger, T., Smith, J., Gruss, P., Serup, P. and Mansouri, A. (2005). The simultaneous loss of Arx and Pax4 genes promotes a somatostatin-producing cell fate specification at the expense of the alpha- and beta-cell lineages in the mouse endocrine pancreas. *Development* **132**, 2969-2980.
- Collombat, P., Hecksher-Sorensen, J., Serup, P. and Mansouri, A. (2006). Specifying pancreatic endocrine cell fates. *Mech. Dev.* **123**, 501-512.
- Crabtree, J. S., Scacheri, P. C., Ward, J. M., Garrett-Beal, L., Emmert-Buck, M. R., Edgemon, K. A., Lorang, D., Libutti, S. K., Chandrasekharappa, S. C., Marx, S. J. et al. (2001). A mouse model of multiple endocrine neoplasia, type 1, develops multiple endocrine tumors. *Proc. Natl. Acad. Sci. USA* **98**, 1118-1123.
- D'Amour, K. A., Agulnick, A. D., Eliazar, S., Kelly, O. G., Kroon, E. and Baetge, E. E. (2005). Efficient differentiation of human embryonic stem cells to definitive endoderm. *Nat. Biotechnol.* **23**, 1534-1541.
- D'Amour, K. A., Bang, A. G., Eliazar, S., Kelly, O. G., Agulnick, A. D., Smart, N. G., Moorman, M. A., Kroon, E., Carpenter, M. K. and Baetge, E. E. (2006). Production of pancreatic hormone-expressing endocrine cells from human embryonic stem cells. *Nat. Biotechnol.* **24**, 1392-1401.
- Dessimoz, J., Opoka, R., Kordich, J. J., Grapin-Botton, A. and Wells, J. M. (2006). FGF signaling is necessary for establishing gut tube domains along the anterior-posterior axis in vivo. *Mech. Dev.* **123**, 42-55.
- Dor, Y., Brown, J., Martinez, O. I. and Melton, D. A. (2004). Adult pancreatic beta-cells are formed by self-duplication rather than stem-cell differentiation. *Nature* **429**, 41-46.
- Dudek, R. W., Lawrence, I. E., Jr, Hill, R. S. and Johnson, R. C. (1991). Induction of islet cytodifferentiation by fetal mesenchyme in adult pancreatic ductal epithelium. *Diabetes* **40**, 1041-1048.
- Duvillie, B., Attali, M., Bounacer, A., Ravassard, P., Basmaciogullari, A. and Scharfmann, R. (2006). The mesenchyme controls the timing of pancreatic beta-cell differentiation. *Diabetes* **55**, 582-589.
- Edlund, H. (2002). Pancreatic organogenesis – developmental mechanisms and implications for therapy. *Nat. Rev. Genet.* **3**, 524-532.
- Esni, F., Johansson, B. R., Radice, G. L. and Semb, H. (2001). Dorsal pancreas agenesis in N-cadherin-deficient mice. *Dev. Biol.* **238**, 202-212.
- Esni, F., Ghosh, B., Biankin, A. V., Lin, J. W., Albert, M. A., Yu, X., MacDonald, R. J., Civin, C. I., Real, F. X., Pack, M. A. et al. (2004). Notch inhibits Ptf1 function and acinar cell differentiation in developing mouse and zebrafish pancreas. *Development* **131**, 4213-4224.
- Ferber, S., Halkin, A., Cohen, H., Ber, I., Einav, Y., Goldberg, I., Barshack, I., Seiffers, R., Kopolovic, J., Kaiser, N. et al. (2000). Pancreatic and duodenal homeobox gene 1 induces expression of insulin genes in liver and ameliorates streptozotocin-induced hyperglycemia. *Nat. Med.* **6**, 568-572.
- Field, H. A., Dong, P. D., Beis, D. and Stainier, D. Y. (2003). Formation of the digestive system in zebrafish. II. Pancreas morphogenesis. *Dev. Biol.* **261**, 197-208.
- Fishman, M. P. and Melton, D. A. (2002). Pancreatic lineage analysis using a retroviral vector in embryonic mice demonstrates a common progenitor for endocrine and exocrine cells. *Int. J. Dev. Biol.* **46**, 201-207.
- Fujikura, J., Hosoda, K., Iwakura, H., Tomita, T., Noguchi, M., Masuzaki, H., Tanigaki, K., Yabe, D., Honjo, T. and Nakao, K. (2006). Notch/Rbp-j signaling prevents premature endocrine and ductal cell differentiation in the pancreas. *Cell Metab.* **3**, 59-65.
- Fukuda, A., Kawaguchi, Y., Furuyama, K., Kodama, S., Horiguchi, M., Kuhara, T., Koizumi, M., Boyer, D. F., Fujimoto, K., Doi, R. et al. (2006). Ectopic pancreas formation in Hes1-knockout mice reveals plasticity of endodermal progenitors of the gut, bile duct, and pancreas. *J. Clin. Invest.* **116**, 1484-1493.
- Gamer, L. W. and Wright, C. V. (1995). Autonomous endodermal determination in *Xenopus*: regulation of expression of the pancreatic gene *XIHbox 8*. *Dev. Biol.* **171**, 240-251.
- Gasa, R., Mrejen, C., Leachman, N., Otten, M., Barnes, M., Wang, J., Chakrabarti, S., Mirmira, R. and German, M. (2004). Proendocrine genes coordinate the pancreatic islet differentiation program in vitro. *Proc. Natl. Acad. Sci. USA* **101**, 13245-13250.
- Georgia, S. and Bhushan, A. (2004). Beta cell replication is the primary mechanism for maintaining postnatal beta cell mass. *J. Clin. Invest.* **114**, 963-968.
- Gierl, M. S., Karoulias, N., Wende, H., Strehle, M. and Birchmeier, C. (2006). The Zinc-finger factor *Insm1* (IA-1) is essential for the development of pancreatic beta cells and intestinal endocrine cells. *Genes Dev.* **20**, 2465-2478.
- Gittes, G. K., Galante, P. E., Hanahan, D., Rutter, W. J. and DeBise, H. T. (1996). Lineage-specific morphogenesis in the developing pancreas: role of mesenchymal factors. *Development* **122**, 439-447.
- Golosov, N. and Grobstein, C. (1962). Epitheliomesenchymal interaction in pancreatic morphogenesis. *Dev. Biol.* **4**, 242-255.
- Gradwohl, G., Dierich, A., LeMeur, M. and Guillemot, F. (2000). neurogenin3 is required for the development of the four endocrine cell lineages of the pancreas. *Proc. Natl. Acad. Sci. USA* **97**, 1607-1611.
- Grapin-Botton, A., Majithia, A. R. and Melton, D. A. (2001). Key events of pancreas formation are triggered in gut endoderm by ectopic expression of pancreatic regulatory genes. *Genes Dev.* **15**, 444-454.
- Gu, G., Dubauskaite, J. and Melton, D. A. (2002). Direct evidence for the pancreatic lineage: NGN3+ cells are islet progenitors and are distinct from duct progenitors. *Development* **129**, 2447-2457.
- Guz, Y., Montminy, M. R., Stein, R., Leonard, J., Gamer, L. W., Wright, C. V. and Teitelman, G. (1995). Expression of murine STF-1, a putative insulin gene transcription factor, in beta cells of pancreas, duodenal epithelium and pancreatic exocrine and endocrine progenitors during ontogeny. *Development* **121**, 11-18.
- Hald, J., Hjorth, J. P., German, M. S., Madsen, O. D., Serup, P. and Jensen, J. (2003). Activated Notch1 prevents differentiation of pancreatic acinar cells and attenuate endocrine development. *Dev. Biol.* **260**, 426-437.
- Haltiwanger, R. S. and Stanley, P. (2002). Modulation of receptor signaling by glycosylation: fringe is an O-fucose-beta1,3-N-acetylglucosaminyltransferase. *Biochim. Biophys. Acta* **1573**, 328-335.
- Hao, E., Tyrberg, B., Itkin-Ansari, P., Lakey, J. R., Geron, I., Monosov, E. Z., Barcova, M., Mercola, M. and Levine, F. (2006). Beta-cell differentiation from nonendocrine epithelial cells of the adult human pancreas. *Nat. Med.* **12**, 310-316.
- Harmon, E. B., Apelqvist, A. A., Smart, N. G., Gu, X., Osborne, D. H. and Kim, S. K. (2004). GDF11 modulates NGN3+ islet progenitor cell number and promotes beta-cell differentiation in pancreas development. *Development* **131**, 6163-6174.
- Harrison, K. A., Thaler, J., Pfaff, S. L., Gu, H. and Kehrl, J. H. (1999). Pancreas dorsal lobe agenesis and abnormal islets of Langerhans in *Hlx9*-deficient mice. *Nat. Genet.* **23**, 71-75.
- Hart, A., Papadopoulou, S. and Edlund, H. (2003). Fgf10 maintains notch activation, stimulates proliferation, and blocks differentiation of pancreatic epithelial cells. *Dev. Dyn.* **228**, 185-193.
- Haumaitre, C., Barbacci, E., Jenny, M., Ott, M. O., Gradwohl, G. and Cereghini, S. (2005). Lack of TCF2/*vHNF1* in mice leads to pancreas agenesis. *Proc. Natl. Acad. Sci. USA* **102**, 1490-1495.
- Heller, R. S., Stoffers, D. A., Hussain, M. A., Miller, C. P. and Habener, J. F. (1998). Misexpression of the pancreatic homeodomain protein *IDX-1* by the *Hoxa-4* promoter associated with agenesis of the cecum. *Gastroenterology* **115**, 381-387.
- Heller, R. S., Jenny, M., Collombat, P., Mansouri, A., Tomasetto, C., Madsen, O. D., Mellitzer, G., Gradwohl, G. and Serup, P. (2005). Genetic determinants of pancreatic epsilon-cell development. *Dev. Biol.* **286**, 217-224.
- Henry, G. L., Brivanlou, I. H., Kessler, D. S., Hemmati-Brivanlou, A. and Melton, D. A. (1996). TGF-beta signals and a pattern in *Xenopus laevis* endodermal development. *Development* **122**, 1007-1015.
- Heremans, Y., Van De Castele, M., in't Veld, P., Gradwohl, G., Serup, P., Madsen, O., Pipeleers, D. and Heimberg, H. (2002). Recapitulation of embryonic neuroendocrine differentiation in adult human pancreatic duct cells expressing neurogenin 3. *J. Cell Biol.* **159**, 303-312.
- Herrera, P. L. (2000). Adult insulin- and glucagon-producing cells differentiate from two independent cell lineages. *Development* **127**, 2317-2322.
- Herrera, P. L., Huarte, J., Sanvito, F., Meda, P., Orci, L. and Vassalli, J. D. (1991). Embryogenesis of the murine endocrine pancreas: early expression of pancreatic polypeptide gene. *Development* **113**, 1257-1265.
- Holland, A. M., Gonez, L. J., Naselli, G., Macdonald, R. J. and Harrison, L. C. (2005). Conditional expression demonstrates the role of the homeodomain transcription factor *Pdx1* in maintenance and regeneration of beta-cells in the adult pancreas. *Diabetes* **54**, 2586-2595.
- Horb, L. D. and Slack, J. M. (2000). Role of cell division in branching morphogenesis and differentiation of the embryonic pancreas. *Int. J. Dev. Biol.* **44**, 791-796.
- Horb, M. E., Shen, C. N., Tosh, D. and Slack, J. M. (2003). Experimental conversion of liver to pancreas. *Curr. Biol.* **13**, 105-115.
- Imai, J., Katagiri, H., Yamada, T., Ishigaki, Y., Ogiwara, T., Uno, K., Hasegawa, Y., Gao, J., Ishihara, H., Sasano, H. et al. (2005). Constitutively active *PDX1* induced efficient insulin production in adult murine liver. *Biochem. Biophys. Res. Commun.* **326**, 402-409.
- Jacquemin, P., Durvieux, S. M., Jensen, J., Godfraind, C., Gradwohl, G., Guillemot, F., Madsen, O. D., Carmeliet, P., Dewerchin, M., Collen, D. et al. (2000). Transcription factor hepatocyte nuclear factor 6 regulates pancreatic endocrine cell differentiation and controls expression of the proendocrine gene *ngn3*. *Mol. Cell Biol.* **20**, 4445-4454.
- Jacquemin, P., Lemaigre, F. P. and Rousseau, G. G. (2003). The *Onecut* transcription factor *HNF-6* (*OC-1*) is required for timely specification of the pancreas and acts upstream of *Pdx-1* in the specification cascade. *Dev. Biol.* **258**, 105-116.
- Jenny, M., Uhl, C., Roche, C., Duluc, I., Guillermin, V., Guillemot, F., Jensen, J., Kedinger, M. and Gradwohl, G. (2002). Neurogenin3 is differentially required for endocrine cell fate specification in the intestinal and gastric epithelium. *EMBO J.* **21**, 6338-6347.
- Jensen, J. (2004). Gene regulatory factors in pancreatic development. *Dev. Dyn.* **229**, 176-200.

- Jensen, J., Pedersen, E. E., Galante, P., Hald, J., Heller, R. S., Ishibashi, M., Kageyama, R., Guillemot, F., Serup, P. and Madsen, O. D. (2000). Control of endodermal endocrine development by Hes-1. *Nat. Genet.* **24**, 36-44.
- Kanai-Azuma, M., Kanai, Y., Gad, J. M., Tajima, Y., Taya, C., Kurohmaru, M., Sanai, Y., Yonekawa, H., Yazaki, K., Tam, P. P. et al. (2002). Depletion of definitive gut endoderm in Sox17-null mutant mice. *Development* **129**, 2367-2379.
- Kaneto, H., Nakatani, Y., Miyatsuka, T., Matsuoka, T. A., Matsuhiwa, M., Hori, M. and Yamasaki, Y. (2005). PDX-1/VP16 fusion protein, together with NeuroD or Ngn3, markedly induces insulin gene transcription and ameliorates glucose tolerance. *Diabetes* **54**, 1009-1022.
- Kataoka, K., Han, S. I., Shioda, S., Hirai, M., Nishizawa, M. and Handa, H. (2002). MafA is a glucose-regulated and pancreatic beta-cell-specific transcriptional activator for the insulin gene. *J. Biol. Chem.* **277**, 49903-49910.
- Kawaguchi, Y., Cooper, B., Gannon, M., Ray, M., MacDonald, R. J. and Wright, C. V. (2002). The role of the transcriptional regulator Ptf1a in converting intestinal to pancreatic progenitors. *Nat. Genet.* **32**, 128-134.
- Kim, S. K., Hebrok, M. and Melton, D. A. (1997). Notochord to endoderm signaling is required for pancreas development. *Development* **124**, 4243-4252.
- Kim, S. K., Hebrok, M., Li, E., Oh, S. P., Schrewe, H., Harmon, E. B., Lee, J. S. and Melton, D. A. (2000). Activin receptor patterning of foregut organogenesis. *Genes Dev.* **14**, 1866-1871.
- Kojima, H., Fujimiya, M., Matsumura, K., Younan, P., Imaeda, H., Maeda, M. and Chan, L. (2003). NeuroD-beta-cellulin gene therapy induces islet neogenesis in the liver and reverses diabetes in mice. *Nat. Med.* **9**, 596-603.
- Krapp, A., Knofler, M., Frutiger, S., Hughes, G. J., Hagenbuchle, O. and Wellauer, P. K. (1996). The p48 DNA-binding subunit of transcription factor PTF1 is a new exocrine pancreas-specific basic helix-loop-helix protein. *EMBO J.* **15**, 4317-4329.
- Krapp, A., Knofler, M., Ledermann, B., Burki, K., Berney, C., Zoerkler, N., Hagenbuchle, O. and Wellauer, P. K. (1998). The bHLH protein PTF1-p48 is essential for the formation of the exocrine and the correct spatial organization of the endocrine pancreas. *Genes Dev.* **12**, 3752-3763.
- Kubo, A., Shinozaki, K., Shannon, J. M., Kouskoff, V., Kennedy, M., Woo, S., Fehling, H. J. and Keller, G. (2004). Development of definitive endoderm from embryonic stem cells in culture. *Development* **131**, 1651-1662.
- Kushner, J. A., Ciemerych, M. A., Sicinska, E., Wartschow, L. M., Teta, M., Long, S. Y., Sicinski, P. and White, M. F. (2005). Cyclins D2 and D1 are essential for postnatal pancreatic beta-cell growth. *Mol. Cell. Biol.* **25**, 3752-3762.
- Lai, E. C. (2004). Notch signaling: control of cell communication and cell fate. *Development* **131**, 965-973.
- Lammert, E., Cleaver, O. and Melton, D. (2001). Induction of pancreatic differentiation by signals from blood vessels. *Science* **294**, 564-567.
- Landry, C., Clotman, F., Hioki, T., Oda, H., Picard, J. J., Lemaigre, F. P. and Rousseau, G. G. (1997). HNF-6 is expressed in endoderm derivatives and nervous system of the mouse embryo and participates to the cross-regulatory network of liver-enriched transcription factors. *Dev. Biol.* **192**, 247-257.
- Lantz, K. A., Vatamaniuk, M. Z., Brestelli, J. E., Friedman, J. R., Matschinsky, F. M. and Kaestner, K. H. (2004). Foxa2 regulates multiple pathways of insulin secretion. *J. Clin. Invest.* **114**, 512-520.
- Lardon, J. and Bouwens, L. (2005). Metaplasia in the pancreas. *Differentiation* **73**, 278-286.
- Lee, C. S., Sund, N. J., Behr, R., Herrera, P. L. and Kaestner, K. H. (2005). Foxa2 is required for the differentiation of pancreatic alpha-cells. *Dev. Biol.* **278**, 484-495.
- Lee, C. S., De Leon, D. D., Kaestner, K. H. and Stoffers, D. A. (2006). Regeneration of pancreatic islets after partial pancreatectomy in mice does not involve the reactivation of neurogenin-3. *Diabetes* **55**, 269-272.
- Lee, J. C., Smith, S. B., Watada, H., Lin, J., Scheel, D., Wang, J., Mirmira, R. G. and German, M. S. (2001). Regulation of the pancreatic pro-endocrine gene neurogenin3. *Diabetes* **50**, 928-936.
- Li, H., Arber, S., Jessell, T. M. and Edlund, H. (1999). Selective agenesis of the dorsal pancreas in mice lacking homeobox gene Hlxb9. *Nat. Genet.* **23**, 67-70.
- Li, W. C., Horb, M. E., Tosh, D. and Slack, J. M. (2005). In vitro transdifferentiation of hepatoma cells into functional pancreatic cells. *Mech. Dev.* **122**, 835-847.
- Li, Z., Manna, P., Kobayashi, H., Spilde, T., Bhatia, A., Preuett, B., Prasad, K., Hembree, M. and Gittes, G. K. (2004). Multifaceted pancreatic mesenchymal control of epithelial lineage selection. *Dev. Biol.* **269**, 252-263.
- Livesey, F. J. and Cepko, C. L. (2001). Vertebrate neural cell-fate determination: lessons from the retina. *Nat. Rev. Neurosci.* **2**, 109-118.
- Malecki, M. T., Jhala, U. S., Antonellis, A., Fields, L., Doria, A., Orban, T., Saad, M., Warram, J. H., Montminy, M. and Krolewski, A. S. (1999). Mutations in NEUROD1 are associated with the development of type 2 diabetes mellitus. *Nat. Genet.* **23**, 323-328.
- Martin, M., Gallego-Llamas, J., Ribes, V., Keding, M., Niederreither, K., Chambon, P., Dolle, P. and Gradwohl, G. (2005). Dorsal pancreas agenesis in retinoic acid-deficient Raldh2 mutant mice. *Dev. Biol.* **284**, 399-411.
- Massague, J., Seoane, J. and Wotton, D. (2005). Smad transcription factors. *Genes Dev.* **19**, 2783-2810.
- Matsuoka, T. A., Zhao, L., Artner, I., Jarrett, H. W., Friedman, D., Means, A. and Stein, R. (2003). Members of the large Maf transcription family regulate insulin gene transcription in islet beta cells. *Mol. Cell. Biol.* **23**, 6049-6062.
- Means, A. L., Meszoely, I. M., Suzuki, K., Miyamoto, Y., Rustgi, A. K., Coffey, R. J., Jr, Wright, C. V., Stoffers, D. A. and Leach, S. D. (2005). Pancreatic epithelial plasticity mediated by acinar cell transdifferentiation and generation of nestin-positive intermediates. *Development* **132**, 3767-3776.
- Mellitzer, G., Bonne, S., Luco, R. F., Van De Castele, M., Lenne-Samuel, N., Collombat, P., Mansouri, A., Lee, J., Lan, M., Pipeleers, D. et al. (2006). IA1 is NGN3-dependent and essential for differentiation of the endocrine pancreas. *EMBO J.* **25**, 1344-1352.
- Micallef, S. J., Janes, M. E., Knezevic, K., Davis, R. P., Elefanty, A. G. and Stanley, E. G. (2005). Retinoic acid induces Pdx1-positive endoderm in differentiating mouse embryonic stem cells. *Diabetes* **54**, 301-305.
- Minami, K., Okuno, M., Miyawaki, K., Okumachi, A., Ishizaki, K., Oyama, K., Kawaguchi, M., Ishizuka, N., Iwanaga, T. and Seino, S. (2005). Lineage tracing and characterization of insulin-secreting cells generated from adult pancreatic acinar cells. *Proc. Natl. Acad. Sci. USA* **102**, 15116-15121.
- Miralles, F., Czernichow, P. and Scharfmann, R. (1998). Follistatin regulates the relative proportions of endocrine versus exocrine tissue during pancreatic development. *Development* **125**, 1017-1024.
- Miralles, F., Lamotte, L., Couton, D. and Joshi, R. L. (2006). Interplay between FGF10 and Notch signalling is required for the self-renewal of pancreatic progenitors. *Int. J. Dev. Biol.* **50**, 17-26.
- Miyatsuka, T., Kaneto, H., Kajimoto, Y., Hirota, S., Arakawa, Y., Fujitani, Y., Umayahara, Y., Watada, H., Yamasaki, Y., Magnuson, M. A. et al. (2003). Ectopically expressed PDX-1 in liver initiates endocrine and exocrine pancreas differentiation but causes dysmorphogenesis. *Biochem. Biophys. Res. Commun.* **310**, 1017-1025.
- Molotkov, A., Molotkova, N. and Duester, G. (2005). Retinoic acid generated by Raldh2 in mesoderm is required for mouse dorsal endodermal pancreas development. *Dev. Dyn.* **232**, 950-957.
- Moriya, N., Komazaki, S., Takahashi, S., Yokota, C. and Asashima, M. (2000). In vitro pancreas formation from *Xenopus* ectoderm treated with activin and retinoic acid. *Dev. Growth Differ.* **42**, 593-602.
- Murtaugh, L. C., Stanger, B. Z., Kwan, K. M. and Melton, D. A. (2003). Notch signaling controls multiple steps of pancreatic differentiation. *Proc. Natl. Acad. Sci. USA* **100**, 14920-14925.
- Naftanel, M. A. and Harlan, D. M. (2004). Pancreatic islet transplantation. *PLoS Med* **1**, e58.
- Naya, F. J., Stellrecht, C. M. and Tsai, M. J. (1995). Tissue-specific regulation of the insulin gene by a novel basic helix-loop-helix transcription factor. *Genes Dev.* **9**, 1009-1019.
- Naya, F. J., Huang, H. P., Qiu, Y., Mutoh, H., DeMayo, F. J., Leiter, A. B. and Tsai, M. J. (1997). Diabetes, defective pancreatic morphogenesis, and abnormal enteroendocrine differentiation in BETA2/neuroD-deficient mice. *Genes Dev.* **11**, 2323-2334.
- Nishimura, W., Kondo, T., Salameh, T., El Khattabi, I., Dodge, R., Bonner-Weir, S. and Sharma, A. (2006). A switch from MafB to MafA expression accompanies differentiation to pancreatic beta-cells. *Dev. Biol.* **293**, 526-539.
- Nishio, J., Gaglia, J. L., Turvey, S. E., Campbell, C., Benoist, C. and Mathis, D. (2006). Islet recovery and reversal of murine type 1 diabetes in the absence of any infused spleen cell contribution. *Science* **311**, 1775-1778.
- Norgaard, G. A., Jensen, J. N. and Jensen, J. (2003). FGF10 signaling maintains the pancreatic progenitor cell state revealing a novel role of Notch in organ development. *Dev. Biol.* **264**, 323-338.
- Offield, M. F., Jetton, T. L., Labosky, P. A., Ray, M., Stein, R. W., Magnuson, M. A., Hogan, B. L. and Wright, C. V. (1996). PDX-1 is required for pancreatic outgrowth and differentiation of the rostral duodenum. *Development* **122**, 983-995.
- Ohlsson, H., Karlsson, K. and Edlund, H. (1993). IPF1, a homeodomain-containing transactivator of the insulin gene. *EMBO J.* **12**, 4251-4259.
- Olbrot, M., Rud, J., Moss, L. G. and Sharma, A. (2002). Identification of beta-cell-specific insulin gene transcription factor RIPE3b1 as mammalian MafA. *Proc. Natl. Acad. Sci. USA* **99**, 6737-6742.
- Otani, K., Kulkarni, R. N., Baldwin, A. C., Krutzfeldt, J., Ueki, K., Stoffel, M., Kahn, C. R. and Polonsky, K. S. (2004). Reduced beta-cell mass and altered glucose sensing impair insulin-secretory function in betaRKO mice. *Am. J. Physiol. Endocrinol. Metab.* **286**, E41-E49.
- Pang, K., Mukonoweshuro, C. and Wong, G. G. (1994). Beta cells arise from glucose transporter type 2 (Glut2)-expressing epithelial cells of the developing rat pancreas. *Proc. Natl. Acad. Sci. USA* **91**, 9559-9563.
- Pictet, R. and Rutter, W. J. (1972). Development of the embryonic endocrine pancreas. In *Handbook of Physiology*. Section 7, Vol. 1 (ed. D. Steiner and N. Freinkel), pp. 25-66. Baltimore: Williams & Williams.
- Pierreux, C. E., Poll, A. V., Kemp, C. R., Clotman, F., Maestro, M. A., Cordi, S., Ferrer, J., Leyns, L., Rousseau, G. G. and Lemaigre, F. P. (2006). The



- transcription factor hepatocyte nuclear factor-6 controls the development of pancreatic ducts in the mouse. *Gastroenterology* **130**, 532-541.
- Piper, K., Brickwood, S., Turnpenny, L. W., Cameron, I. T., Ball, S. G., Wilson, D. I. and Hanley, N. A.** (2004). Beta cell differentiation during early human pancreas development. *J. Endocrinol.* **181**, 11-23.
- Prado, C. L., Pugh-Bernard, A. E., Elghazi, L., Sosa-Pineda, B. and Sussel, L.** (2004). Ghrelin cells replace insulin-producing beta cells in two mouse models of pancreas development. *Proc. Natl. Acad. Sci. USA* **101**, 2924-2929.
- Rane, S. G., Dubus, P., Mettus, R. V., Galbreath, E. J., Boden, G., Reddy, E. P. and Barbacid, M.** (1999). Loss of Cdk4 expression causes insulin-deficient diabetes and Cdk4 activation results in beta-islet cell hyperplasia. *Nat. Genet.* **22**, 44-52.
- Rausa, F., Samadani, U., Ye, H., Lim, L., Fletcher, C. F., Jenkins, N. A., Copeland, N. G. and Costa, R. H.** (1997). The cut-homeodomain transcriptional activator HNF-6 is coexpressed with its target gene HNF-3 beta in the developing murine liver and pancreas. *Dev. Biol.* **192**, 228-246.
- Sander, M., Neubuser, A., Kalamaras, J., Ee, H. C., Martin, G. R. and German, M. S.** (1997). Genetic analysis reveals that PAX6 is required for normal transcription of pancreatic hormone genes and islet development. *Genes Dev.* **11**, 1662-1673.
- Sander, M., Sussel, L., Conners, J., Scheel, D., Kalamaras, J., Dela Cruz, F., Schwartzgebel, V., Hayes-Jordan, A. and German, M.** (2000). Homeobox gene Nkx6.1 lies downstream of Nkx2.2 in the major pathway of beta-cell formation in the pancreas. *Development* **127**, 5533-5540.
- Sanvito, F., Herrera, P. L., Huarte, J., Nichols, A., Montesano, R., Orci, L. and Vassalli, J. D.** (1994). TGF-beta 1 influences the relative development of the exocrine and endocrine pancreas in vitro. *Development* **120**, 3451-3462.
- Sapir, T., Shternhall, K., Meivar-Levy, I., Blumenfeld, T., Cohen, H., Skutelsky, E., Eventov-Friedman, S., Barshack, I., Goldberg, I., Pri-Chen, S. et al.** (2005). Cell-replacement therapy for diabetes: Generating functional insulin-producing tissue from adult human liver cells. *Proc. Natl. Acad. Sci. USA* **102**, 7964-7969.
- Schwitzgebel, V. M., Scheel, D. W., Conners, J. R., Kalamaras, J., Lee, J. E., Anderson, D. J., Sussel, L., Johnson, J. D. and German, M. S.** (2000). Expression of neurogenin3 reveals an islet cell precursor population in the pancreas. *Development* **127**, 3533-3542.
- Servitja, J. M. and Ferrer, J.** (2004). Transcriptional networks controlling pancreatic development and beta cell function. *Diabetologia* **47**, 597-613.
- Sharma, A., Zangen, D. H., Reitz, P., Taneja, M., Lissauer, M. E., Miller, C. P., Weir, G. C., Habener, J. F. and Bonner-Weir, S.** (1999). The homeodomain protein IDX-1 increases after an early burst of proliferation during pancreatic regeneration. *Diabetes* **48**, 507-513.
- Slack, J. M.** (1995). Developmental biology of the pancreas. *Development* **121**, 1569-1580.
- Smith, S. B., Gasa, R., Watada, H., Wang, J., Griffen, S. C. and German, M. S.** (2003). Neurogenin3 and hepatic nuclear factor 1 cooperate in activating pancreatic expression of Pax4. *J. Biol. Chem.* **278**, 38254-38259.
- Soriano, P.** (1999). Generalized lacZ expression with the ROSA26 Cre reporter strain. *Nat. Genet.* **21**, 70-71.
- Sosa-Pineda, B., Chowdhury, K., Torres, M., Oliver, G. and Gruss, P.** (1997). The Pax4 gene is essential for differentiation of insulin-producing beta cells in the mammalian pancreas. *Nature* **386**, 399-402.
- Stafford, D. and Prince, V. E.** (2002). Retinoic acid signaling is required for a critical early step in zebrafish pancreatic development. *Curr. Biol.* **12**, 1215-1220.
- Stiles, B. L., Kuralwalla-Martinez, C., Guo, W., Gregorian, C., Wang, Y., Tian, J., Magnuson, M. A. and Wu, H.** (2006). Selective deletion of Pten in pancreatic beta cells leads to increased islet mass and resistance to STZ-induced diabetes. *Mol. Cell. Biol.* **26**, 2772-2781.
- Stoffers, D. A., Ferrer, J., Clarke, W. L. and Habener, J. F.** (1997). Early-onset type-II diabetes mellitus (MODY4) linked to IPF1. *Nat. Genet.* **17**, 138-139.
- Sumazaki, R., Shiojiri, N., Ioyama, S., Masu, M., Keino-Masu, K., Osawa, M., Nakauchi, H., Kageyama, R. and Matsui, A.** (2004). Conversion of biliary system to pancreatic tissue in Hes1-deficient mice. *Nat. Genet.* **36**, 83-87.
- Sun, Z. and Hopkins, N.** (2001). vhnf1, the MODY5 and familial GCKD-associated gene, regulates regional specification of the zebrafish gut, pronephros, and hindbrain. *Genes Dev.* **15**, 3217-3229.
- Suri, A., Calderon, B., Esparza, T. J., Frederick, K., Bittner, P. and Unanue, E. R.** (2006). Immunological reversal of autoimmune diabetes without hematopoietic replacement of beta cells. *Science* **311**, 1778-1780.
- Sussel, L., Kalamaras, J., Hartigan-O'Connor, D. J., Meneses, J. J., Pedersen, R. A., Rubenstein, J. L. and German, M. S.** (1998). Mice lacking the homeodomain transcription factor Nkx2.2 have diabetes due to arrested differentiation of pancreatic beta cells. *Development* **125**, 2213-2221.
- Swift, G. H., Liu, Y., Rose, S. D., Bischof, L. J., Steelman, S., Buchberg, A. M., Wright, C. V. and MacDonald, R. J.** (1998). An endocrine-exocrine switch in the activity of the pancreatic homeodomain protein PDX1 through formation of a trimeric complex with PBX1b and MRG1 (MEIS2). *Mol. Cell. Biol.* **18**, 5109-5120.
- Teitelman, G., Alpert, S., Polak, J. M., Martinez, A. and Hanahan, D.** (1993). Precursor cells of mouse endocrine pancreas coexpress insulin, glucagon and the neuronal proteins tyrosine hydroxylase and neuropeptide Y, but not pancreatic polypeptide. *Development* **118**, 1031-1039.
- Tremblay, K. D., Hoodless, P. A., Bikoff, E. K. and Robertson, E. J.** (2000). Formation of the definitive endoderm in mouse is a Smad2-dependent process. *Development* **127**, 3079-3090.
- Turner, D. L. and Cepko, C. L.** (1987). A common progenitor for neurons and glia persists in rat retina late in development. *Nature* **328**, 131-136.
- Vatamaniuk, M. Z., Gupta, R. K., Lantz, K. A., Doliba, N. M., Matschinsky, F. M. and Kaestner, K. H.** (2006). Foxa1-deficient mice exhibit impaired insulin secretion due to uncoupled oxidative phosphorylation. *Diabetes* **55**, 2730-2736.
- Waeber, G., Thompson, N., Nicod, P. and Bonny, C.** (1996). Transcriptional activation of the GLUT2 gene by the IPF-1/STF-1/IDX-1 homeobox factor. *Mol. Endocrinol.* **10**, 1327-1334.
- Wang, J., Elghazi, L., Parker, S. E., Kizilocak, H., Asano, M., Sussel, L. and Sosa-Pineda, B.** (2004). The concerted activities of Pax4 and Nkx2.2 are essential to initiate pancreatic beta-cell differentiation. *Dev. Biol.* **266**, 178-189.
- Wang, J., Cortina, G., Wu, S. V., Tran, R., Cho, J. H., Tsai, M. J., Bailey, T. J., Jamrich, M., Ament, M. E., Treem, W. R. et al.** (2006). Mutant neurogenin-3 in congenital malabsorptive diarrhea. *N. Engl. J. Med.* **355**, 270-280.
- Watada, H., Kajimoto, Y., Kaneto, H., Matsuoka, T., Fujitani, Y., Miyazaki, J. and Yamasaki, Y.** (1996). Involvement of the homeodomain-containing transcription factor PDX-1 in islet amyloid polypeptide gene transcription. *Biochem. Biophys. Res. Commun.* **229**, 746-751.
- Watada, H., Scheel, D. W., Leung, J. and German, M. S.** (2003). Distinct gene expression programs function in progenitor and mature islet cells. *J. Biol. Chem.* **278**, 17130-17140.
- Wells, J. M. and Melton, D. A.** (2000). Early mouse endoderm is patterned by soluble factors from adjacent germ layers. *Development* **127**, 1563-1572.
- Wessells, N. K. and Cohen, J. H.** (1967). Early pancreatic organogenesis: morphogenesis, tissue interactions and mass effects. *Dev. Biol.* **15**, 237-270.
- Wierup, N., Svensson, H., Mulder, H. and Sundler, F.** (2002). The ghrelin cell: a novel developmentally regulated islet cell in the human pancreas. *Regul. Pept.* **107**, 63-69.
- Wilson, M. E., Kalamaras, J. A. and German, M. S.** (2002). Expression pattern of IAPP and prohormone convertase 1/3 reveals a distinctive set of endocrine cells in the embryonic pancreas. *Mech. Dev.* **115**, 171-176.
- Wu, K. L., Gannon, M., Peshavaria, M., Offield, M. F., Henderson, E., Ray, M., Marks, A., Gamer, L. W., Wright, C. V. and Stein, R.** (1997). Hepatocyte nuclear factor 3beta is involved in pancreatic beta-cell-specific transcription of the pdx-1 gene. *Mol. Cell. Biol.* **17**, 6002-6013.
- Xu, Y., Wang, S., Zhang, J., Zhao, A., Stanger, B. Z. and Gu, G.** (2006). The fringe molecules induce endocrine differentiation in embryonic endoderm by activating cMyt1/cMyt3. *Dev. Biol.* **297**, 340-349.
- Yasunaga, M., Tada, S., Torikai-Nishikawa, S., Nakano, Y., Okada, M., Jakt, L. M., Nishikawa, S., Chiba, T., Era, T. and Nishikawa, S.** (2005). Induction and monitoring of definitive and visceral endoderm differentiation of mouse ES cells. *Nat. Biotechnol.* **23**, 1542-1550.
- Yoshitomi, H. and Zaret, K. S.** (2004). Endothelial cell interactions initiate dorsal pancreas development by selectively inducing the transcription factor Ptf1a. *Development* **131**, 807-817.
- Zaret, K. S.** (2002). Regulatory phases of early liver development: paradigms of organogenesis. *Nat. Rev. Genet.* **3**, 499-512.
- Zecchin, E., Filippi, A., Biemar, F., Tiso, N., Pauls, S., Ellersdottir, E., Gnugge, L., Bortolussi, M., Driever, W. and Argenton, F.** (2006). Distinct delta and jagged genes control sequential segregation of pancreatic cell types from precursor pools in zebrafish. *Dev. Biol.* doi:10.1016/j.ydbio.2006.09.041.
- Zhang, C., Moriguchi, T., Kajihara, M., Esaki, R., Harada, A., Shimohata, H., Oishi, H., Hamada, M., Morito, N., Hasegawa, K. et al.** (2005). MafA is a key regulator of glucose-stimulated insulin secretion. *Mol. Cell. Biol.* **25**, 4969-4976.
- Zhang, H., Ackermann, A. M., Gusarova, G. A., Lowe, D., Feng, X., Kopsombut, U. G., Costa, R. H. and Gannon, M.** (2006). The FoxM1 transcription factor is required to maintain pancreatic beta-cell mass. *Mol. Endocrinol.* **20**, 1853-1866.
